# Supplementary material for: Association of Angiotensin‐Converting Enzyme Inhibitors and Angiotensin Receptor Blockers With the Risk of Hospitalization and Death in Hypertensive Patients With COVID‐19
Source: PubMed Central journal article supplement — J Am Heart Assoc. 2021 Jun 16;10(13):e018086. doi: 10.1161/JAHA.120.018086 (PMC8403305; doi:10.1161/jaha.120.018086), 2021-06-16

# **SUPPLEMENTAL MATERIAL**

## Data S1.

### Supplemental Methods

#### Data Sources and Quality Control

Data entry: Medical and pharmacy claims data are captured, predominantly electronically, from sites of care seeking third-party reimbursement for both Medicare and commercial plans using the industry standard data collection forms HCFA/CMS-1500 for facility claims, UB04/CMS-1450 for professional services and outpatient claims, and NCPDP for pharmacy claims or their electronic equivalents. Structured data from these standardized forms are coded using the International Classification of Diseases, Tenth Revision, Clinical Modification (ICD-10-CM), National Drug Codes (NDC), Current Procedural Terminology (CPT) codes, Logical Observation Identifiers Names and Codes (LOINC) codes, and Diagnosis Related Groups (DRG). This nomenclature ensures consistency of data collection across geographic regions, health systems, and payers throughout the United States.

Methods to Control for Errors in Sampling & Data Collection: Claims that do not adhere to the form or coding standards described above are rejected from reimbursement, minimizing the risk that inappropriately structured data are included in the database. Data specific to SARS-CoV-2 and COVID-19 has an additional Quality Control layer to control for errors in sampling and data collection; this is described below in the Quality Control section.

Data Relevance & Accuracy: Data are transferred into the UnitedHealth Group R&D Data Platform, where a dedicated team pursues data management to ensure accurate matching of source data to an individual. This protocol uses unique identifiers to match them to existing identifiers in the UHG R&D Data Platform to determine whether the individual already exists in the platform. A unique identification number is generated for each individual so that data from multiple sources can be linked back to that identification number. Individuals that fail to meet the matching criteria are excluded from the UHG R&D Data Platform to reduce the risk of erroneous linkage of records. Those whose claims do not fulfill basic standardized data structure requirements described previously are also excluded. During this, all member protected data are stored in a separate database that is only accessible by a designated engineering team. In addition to a persistent identifier being generated for each member, a de-identified primary key is also generated. The de-identified primary key is recycled every 6 months, at which time each member is assigned a new de-identified primary key. Data that are made available for research through the UHG Clinical Discovery Database use the de-identified primary key as the link across data tables. All protected information has been removed, ensuring any research performed is limited to retrospective analysis of de-identified data and accessed in accordance with Health Insurance Portability and Accountability Act regulations.

Sufficiency of basic data: As described above, individuals lacking enough data to be assigned a unique primary key are excluded from the UHG Clinical Discovery Database, as are members whose claims did not fulfill basic data structure requirements. In a given month in 2019, the UHG Clinical Discovery Database contained one or more claims from 5 million Medicare Advantage enrollees and 20 million commercially insured individuals. Further information on data sufficiency for the research performed in this manuscript can be found in the study selection flowsheets (Figure S1 and Figure S2).

Adequacy of possible derived data / Design of computer editing methods: To reduce the risk of introducing error to standardized, structured claims data, derivation of source data within the UHG Clinical Discovery Database is minimal. The Data Integration team loads, formats, and join the data to appropriate dimension tables. Dimension tables are combined with raw claims information to limit the number of times external tables need to be referenced. Researchers may request derived fields within data tables prepared specifically for a project. This process is managed by the Data Enrichment team, who creates data dictionaries to accompany derived fields. Tables containing derived data are stored separately from raw source data. Access to modify/edit source data is restricted to a subset of data specialists. Each step in the data flow has a restricted list of individuals able to perform any type of editing to the database, and access level varies by team (Data Integration, Data Enrichment). Researchers using the

UHG Clinical Discovery Database may not edit any source data or enrichment data. They are instead given access to “sandbox” locations where they may request editing access for the data tables used in their analyses.

**Quality control:** In addition to the quality control mechanisms described during the matching procedures to reject non-linkable or inappropriately structured data, a COVID-19 data source-specific layer of quality control is also present, given the rapidly evolving situation. SARS-CoV-2 lab tests included in the UHG Clinical Discovery Database exclude custom local codes or codes that are not present in the LOINC organization’s guidance for mapping SARS-CoV-2 and COVID-19 related LOINC terms. Test information provided via the LOINC code complements the test type (antibody, PCR, etc.) as well as the result value (detected, not detected, not given/cancelled). Members with a qualified COVID-19 related hospital admission are included in the report when any diagnosis matches qualified ICD-10 codes as defined in **Table S1**. Suspected COVID-19 inpatient cases are manually reviewed daily by health plan clinical staff via clinical notes to determine an individual’s COVID-19 status. Each case is then manually flagged as either negative, confirmed, presumed positive, or needs clinical review. If a case is confirmed, it is not reviewed again. If a case is listed as negative or unknown, it is periodically reviewed for changes in the record. All others are reviewed and updated daily.

**Differences across groups:** While the data for Medicare Advantage and commercially insured enrollees is processed in a similar manner, these groups are substantially different. First, there are systematic differences in patient characteristics, most remarkably the older age and the higher prevalence of all comorbidities. These differences are tabulated in Table S3. Second, while Medicare includes all Medicare Advantage enrollees in the UHG Clinical Discovery Database, there are restrictions from individual employers on these use of data for research. Therefore, commercial insurance claims that are available for analyses are a subset of the overall commercially insured population.

#### Estimation of Propensity Score Model

In both outpatient and inpatient studies, we created propensity score-matched cohorts of patients with hypertension, treated with ACE inhibitors, ARBs or other antihypertensive medications. For this, we constructed a non-parsimonious multivariable logistic regression model with receipt of ACE inhibitors, ARB or other antihypertensive as the dependent variable. These analyses were conducted across pairs of comparisons. For example, we modeled the receipt ACE inhibitor or another other antihypertensive (excluding ARB) to determine each patient’s probability of receiving these agents based on their measured clinical characteristics. For this, the receipt of ACE inhibitor or other agent (ACE = ‘1’ and Other = ‘0’) was used as a dependent variable in a logistic regression model and used a set of patient-level covariates as independent variables. These included patient age, sex, race, insurance type, conditions that may lead to selective use of ACE inhibitors and ARBs (i.e., diabetes, myocardial infarction, heart failure, and chronic kidney disease), each of the comorbidities in the Charlson Comorbidity Index (peripheral vascular disease, cerebrovascular disease, hemi- or paraplegia, dementia, chronic pulmonary disease, rheumatologic disease, diabetes with chronic complications, malignancy, metastatic solid tumor, mild liver disease, moderate-to-severe liver disease, acquired immunodeficiency syndrome or human immunodeficiency virus), and the number of antihypertensive agents used for the patient. To account for regional clustering of care practices and response to the COVID-19 pandemic, we explicitly accounted for census region of lab testing site or inpatient facility in our models. We applied this strategy to different pairs of treatment comparisons (ACE inhibitor vs others, ARB vs others, and ACE inhibitor vs ARB) to assess the propensity of being treated with either agent in pairwise comparisons.

#### Matching Algorithm

We used a dedicated algorithm that matched the “cases” to “controls” in one-to-one fashion for each of 3 comparisons - ACE inhibitor vs others, ARB vs others, and ACE inhibitor vs ARB. Such matched pairs were selected based on propensity scores with a caliper width of one-tenth of the standard deviation of the logit of the propensity score. The propensity score and matching algorithm were pursued over 100 iterations to find the lowest mean absolute standardized difference among matched variables.

## Evaluation of the Propensity Score Matching

We evaluated the performance of propensity score matching using several strategies.

- (1) We assessed the propensity score distributions in the unmatched and matched cohorts and calculated an equipoise metric to summarize the degree of overlap in characteristics of patients receiving these drugs.<sup>17, 40</sup> This represents the proportion of individuals in the unmatched groups that had a propensity score between 0.3 and 0.7, representing a state of equipoise between the two drugs. A value greater than 0.5 implies two drugs are in empirical equipoise, with a higher a value indicating a lower likelihood of confounding by indication.<sup>40</sup>
- (2) We evaluated the standardized difference between matched covariates before and after propensity score matching. Specifically, we evaluated whether our matching algorithm achieved a standardized difference of <10% between matched cohort suggestive of adequately matched groups.<sup>17, 19</sup>
- (3) We evaluated the success of our matching algorithm using negative control or falsification endpoints. We chose these negative controls from published data on hypertension drug evaluations using claims data. These endpoints were defined from the claim records for study participants between January 1, 2019 and December 31, 2019, and therefore, preceded the infection with SARS-CoV-2.<sup>17</sup> The chosen falsification endpoints were based on the assertion that they are unlikely to be affected by the treatment assignment and a directional effect would represent covariate imbalance.

These strategies were designed to evaluate the potential for residual confounding after creating propensity score matched cohorts. Finally, we evaluated our observations for robustness by assessing treatment effects in 100 iterations of the propensity score matching algorithm, evaluating whether our findings were consistent across these iterations that varied on the degree of matching of individual covariates.

**Table S1. ICD-10 codes.**

**Inclusion Criteria**  
**Inclusion Criteria**

|              |                                                  |
|--------------|--------------------------------------------------|
| Hypertension | I10%, I11%, I12%, I13%, I15%, I16%, I67.4, N26.2 |
| COVID-19     | U071, U072, B9729                                |

**Charlson Comorbidity Indices**  
**Charlson Comorbidity Index**

|                                                 | <b>ICD-10 Codes</b>                                                                                                                                                                                                                                                                                                     |
|-------------------------------------------------|-------------------------------------------------------------------------------------------------------------------------------------------------------------------------------------------------------------------------------------------------------------------------------------------------------------------------|
| Diabetes Mellitus Without Chronic Complications | E101, E106, E108, E109, E110, E111, E116, E118, E119, E130, E131, E136, E138, E139                                                                                                                                                                                                                                      |
| Diabetes Mellitus With Chronic Conditions       | E102, E103, E104, E105, E112, E113, E114, E115, E132, E133, E134, E135                                                                                                                                                                                                                                                  |
| Myocardial Infarction                           | I210, I211, I212, I213, I214, I219, I21a, I220, I221, I222, I228, I229, I251, I252, I253, I254, I255, I256, I257, I258, I259                                                                                                                                                                                            |
| Chronic Heart Failure                           | I099, I110, I130, I132, I255, I420, I425, I426, I427, I428, I429, I501, I502, I503, I504, I508, I509                                                                                                                                                                                                                    |
| Chronic Pulmonary Disease                       | J430, J431, J432, J438, J439, J440, J441, J449, J452, J453, J454, J455, J459, J470, J471, J479, J620, J628, J630, J631, J632, J633, J634, J635, J636, J660, J661, J662, J668, J670, J671, J672, J673, J674, J676, J677, J678, J679, J684, J701, J703                                                                    |
| Peptic Ulcer Disease                            | K250, K282, K259, K277, K269, K256, K286, K272, K273, K285, K253, K270, K280, K275, K266, K281, K276, K274, K283, K287, K252, K251, K257, K260, K284, K289, K254, K263, K261, K267, K262, K264, K259, K271, K265, K255, K279                                                                                            |
| Acquired Immunodeficiency Syndrome              | B200, B201, B202, B205, B209                                                                                                                                                                                                                                                                                            |
| Rheumatic Disease                               | M069, M315, M320, M321, M322, M323, M325, M328, M329, M330, M331, M332, M333, M334, M335, M336, M339, M340, M341, M342, M343, M344, M345, M346, M348, M349, M353, M360                                                                                                                                                  |
| Hemiplegia and Paraplegia                       | G114, G801, G802, G810, G811, G818, G819, G820, G821, G822, G825, G828, G829, G830, G831, G832                                                                                                                                                                                                                          |
| Mild Liver Disease                              | B187, B188, B189, K700, K701, K702, K703, K709, K713, K714, K715, K717, K730, K731, K732, K735, K736, K738, K739, K73q, K740, K741, K742, K743, K744, K745, K746, K760, K762, K763, K764, K768, K769, Z944                                                                                                              |
| Moderate to Severe Liver Disease                | C975, I850, I864, K704, K711, K721, K729, K765, K766, K767                                                                                                                                                                                                                                                              |
| Dementia                                        | F015, F028, F039, G300, G301, G308, G309, G311                                                                                                                                                                                                                                                                          |
| Renal Disease                                   | I120, I131, N032, N033, N034, N035, N036, N037, N052, N053, N054, N055, N056, N057, N181, N182, N183, N184, N185, N186, N189, N250, Z490, Z940, Z992                                                                                                                                                                    |
| Cerebrovascular Disease                         | G468, I690, G462, I606, G452, I682, I613, I634, I650, I668, I662, I670, G463, I679, I673, H340, I607, I669, G464, I692, I699, G454, I691, I620, I660, I658, I605, I635, I608, G461, I602, I616, G458, I676, I604, I699, I621, I600, I677, I672, G459, I609, I630                                                        |
| Any Malignancy Without Metastasis               | C000, C001, C002, C003, C004, C005, C006, C008, C009, C010, C019, C020, C021, C022, C023, C024, C028, C029, C030, C031, C032, C034, C037, C038, C039, C040, C041, C044, C047, C048, C049, C050, C051, C051, C052, C058, C059, C060, C061, C062, C068, C069, C080, C081, C083, C088, C089, C090, C091, C095, C098, C099, |

C100, C101, C102, C103, C103, C104, C108, C109, C110, C111, C112, C113, C118, C119, C120, C122, C124, C127, C130, C131, C132, C134, C137, C138, C139, C140, C142, C148, C150, C151, C153, C154, C155, C158, C159, C160, C161, C162, C163, C164, C165, C166, C168, C169, C170, C171, C172, C173, C176, C177, C178, C179, C180, C181, C182, C183, C184, C185, C185, C186, C187, C188, C189, C190, C195, C197, C199, C200, C202, C203, C207, C210, C211, C212, C218, C220, C221, C222, C223, C224, C227, C228, C229, C237, C239, C240, C241, C244, C245, C248, C249, C250, C251, C252, C253, C254, C256, C257, C258, C259, C260, C261, C268, C269, C300, C301, C309, C310, C311, C312, C313, C314, C318, C319, C320, C321, C322, C323, C328, C329, C330, C333, C334, C340, C341, C341, C342, C343, C345, C346, C347, C348, C349, C374, C379, C380, C381, C382, C383, C384, C388, C390, C391, C392, C399, C400, C401, C402, C403, C404, C405, C408, C409, C410, C411, C412, C413, C414, C415, C417, C419, C430, C431, C432, C433, C434, C435, C436, C437, C437, C438, C439, C43, C450, C451, C452, C457, C458, C459, C460, C461, C462, C463, C464, C465, C467, C469, C470, C471, C472, C473, C474, C475, C476, C477, C478, C479, C480, C481, C482, C485, C488, C48a, C490, C491, C492, C493, C494, C495, C496, C498, C499, C49a, C500, C501, C502, C503, C504, C505, C506, C508, C509, C510, C511, C512, C513, C514, C518, C519, C520, C521, C522, C524, C528, C530, C530, C531, C538, C539, C540, C541, C542, C543, C548, C549, C550, C551, C560, C561, C562, C564, C568, C569, C570, C571, C572, C573, C574, C575, C576, C577, C578, C579, C580, C583, C585, C589, C600, C601, C602, C604, C605, C608, C609, C610, C614, C615, C616, C617, C618, C619, C61f, C620, C621, C628, C629, C630, C631, C632, C635, C637, C638, C639, C641, C642, C647, C649, C650, C651, C652, C658, C659, C661, C662, C669, C670, C671, C672, C673, C674, C675, C676, C677, C678, C679, C680, C681, C688, C689, C690, C691, C692, C693, C694, C695, C696, C698, C699, C700, C701, C709, C710, C711, C712, C713, C714, C715, C716, C717, C718, C719, C720, C721, C722, C723, C724, C725, C726, C729, C730, C731, C740, C741, C745, C748, C749, C750, C751, C752, C753, C754, C755, C758, C759, C760, C761, C762, C763, C764, C765, C768, C810, C811, C812, C813, C814, C817, C819, C820, C821, C822, C823, C824, C825, C826, C828, C829, C829, C830, C831, C833, C835, C837, C838, C839, C840, C841, C842, C844, C846, C847, C848, C849, C84a, C84z, C851, C852, C858, C859, C880, C882, C883, C884, C888, C889, C900, C901, C902, C903, C903, C908, C909, C910, C911, C912, C913, C914, C915, C916, C919, C91a, C91z, C920, C920, C921, C922, C923, C924, C925, C925, C926, C927, C929, C92a, C92z, C930, C931, C932, C933, C934, C938, C939, C93z, C940, C942, C943, C944, C946, C948, C950, C951, C952, C959, C960, C962, C964, C965, C966, C968, C969, C96a, C96z, C975

Metastatic Solid Tumor

C770, C771, C772, C773, C774, C775, C778, C779, C780, C781, C782, C783, C784, C785, C786, C787, C788, C789, C790, C791, C792, C793, C794, C795, C796, C797, C798, C799, C800, C801, C802, C809

## Falsification Endpoints

### Falsification Endpoints

Absent kidney

Anal and rectal polyp

Gastro-esophageal reflux disease

Herpes zoster without complications

Ingrown nail

Latent effects of motor vehicle accident

Nicotine dependence

Pain in wrist

Presbyopia

### ICD-10 Codes

Q600, Q601, Q602, Z905

K600, K601

K210, K219

B029

L600

V877, V890, V892

F172%

M2553%

H524

Strain of rotator cuff capsule

S4342%

Wrist drop

M2133%

**Table S2. Drug classes & generic names.**

**Antihypertensive Drugs**

| Use in Hypertension | Therapeutic Class                                    | Generic Name                                                                                                                                                                                                                                                                                                                                                                                                                                                                                                                                                                                                                                                                                                                                                                                                                                                                             |
|---------------------|------------------------------------------------------|------------------------------------------------------------------------------------------------------------------------------------------------------------------------------------------------------------------------------------------------------------------------------------------------------------------------------------------------------------------------------------------------------------------------------------------------------------------------------------------------------------------------------------------------------------------------------------------------------------------------------------------------------------------------------------------------------------------------------------------------------------------------------------------------------------------------------------------------------------------------------------------|
| First line          | Angiotensin-converting enzyme inhibitors             | Benazepril/hydrochlorothiazide, Benazepril HCl, Captopril, Captopril/hydrochlorothiazide, Enalapril/hydrochlorothiazide, Enalapril maleate, Fosinopril/hydrochlorothiazide, Fosinopril sodium, Lisinopril, Lisinopril/hydrochlorothiazide, moexipril/hydrochlorothiazide, Moexipril HCl, Perindopril arg/amlodipine bes, Perindopril erbumine, Quinapril/hydrochlorothiazide, Quinapril HCl, Ramipril, Trandolapril, Trandolapril/verapamil HCl                                                                                                                                                                                                                                                                                                                                                                                                                                          |
|                     | Angiotensin II receptor antagonists                  | Azilsartan med/chlorthalidone, Azilsartan medoxomil, Candesartan/hydrochlorothiazid, Candesartan cilexetil, Eprosartan mesylate, Irbesartan, Irbesartan/hydrochlorothiazide, Losartan/hydrochlorothiazide, Losartan potassium, Olmesartan/amlodipin/hcthiazid, Olmesartan/hydrochlorothiazide, Olmesartan, medoxomil, Sacubitril/valsartan, Telmisartan, Telmisartan/amlodipine, Telmisartan/hydrochlorothiazid, Valsartan, Valsartan/hydrochlorothiazide                                                                                                                                                                                                                                                                                                                                                                                                                                |
|                     | Calcium-channel blocking agents, dihydropyridine     | Amlodipine benzoate, Amlodipine besylate, Amlodipine besylate/valsartan, Amlodipine/valsartan/hcthiazid, Amlodipine es/olmesartan med, Amlodipine besylate/benazepril Felodipine, Isradipine, Nifedipine, Nisoldipine, olmesartan/amlodipin/hcthiazid, telmisartan/amlodipine                                                                                                                                                                                                                                                                                                                                                                                                                                                                                                                                                                                                            |
|                     | Calcium-channel blocking agents, non-dihydropyridine | Diltiazem HCl, Verapamil HCl                                                                                                                                                                                                                                                                                                                                                                                                                                                                                                                                                                                                                                                                                                                                                                                                                                                             |
| Second line         | Thiazide and thiazide-like diuretics                 | Amiloride/hydrochlorothiazide , Amlodipine/valsartan/hcthiazid, Azilsartan med/chlorthalidone, Benazepril/hydrochlorothiazide, Bisoprolol/hydrochlorothiazide, Bisoprolol fumarate/hctz, Candesartan/hydrochlorothiazide, Captopril/hydrochlorothiazide, Clonidine HCl/chlorthalidone, Chlorothiazide, Hydrochlorothiazide, Chlorthalidone, Enalapril/hydrochlorothiazide, Fosinopril/hydrochlorothiazide, Indapamide, Irbesartan/hydrochlorothiazide, Lisinopril/hydrochlorothiazide, Losartan/hydrochlorothiazide, Methyl dopa/hydrochlorothiazide, Metolazone, Metoprolol/hydrochlorothiazide, Metoprolol su/hydrochlorothiaz, Moexipril/hydrochlorothiazide, Nadolol/Bendroflumethiazide, Olmesartan/hydrochlorothiazide, Olmesartan/amlodipin/hcthiazid, Quinapril/hydrochlorothiazide, Trandolapril/verapamil HCl, triamterene/hydrochlorothiazide, Propranolol/hydrochlorothiazid |
|                     | Alpha adrenergic antagonists                         | Doxazosin mesylate, Prazosin HCl, Terazosin HCl                                                                                                                                                                                                                                                                                                                                                                                                                                                                                                                                                                                                                                                                                                                                                                                                                                          |
|                     | Beta-adrenergic blocking agents                      | Acebutolol HCl, Atenolol, Atenolol/chlorthalidone, Betaxolol HCl Bisoprolol/hydrochlorothiazide, Bisoprolol fumarate, Bisoprolol fumarate/hctz, Carvedilol, Carvedilol phosphate, Labetalol HCl, Metoprolol/hydrochlorothiazide, Metoprolol u/hydrochlorothiaz, Metoprolol succinate, Metoprolol tartrate, Nadolol, Nadolol/bendroflumethiazide, Nebivolol HCl, Nebivolol HCl/valsartan, Pindolol, Propranolol/hydrochlorothiazid, Propranolol HCl                                                                                                                                                                                                                                                                                                                                                                                                                                       |
|                     | Central alpha-agonists                               | Clonidine, Clonidine HCl, Clonidine HCl/chlorthalidone, Guanfacine HCl, Methyl dopa, Methyl dopa/hydrochlorothiazide                                                                                                                                                                                                                                                                                                                                                                                                                                                                                                                                                                                                                                                                                                                                                                     |
|                     | Direct vasodilators                                  | Hydralazine HCl, isosorbide dinit/hydralazine, minoxidil                                                                                                                                                                                                                                                                                                                                                                                                                                                                                                                                                                                                                                                                                                                                                                                                                                 |



|                                        |                                                                                           |
|----------------------------------------|-------------------------------------------------------------------------------------------|
| Loop diuretics                         | Bumetanide, Torsemide, Furosemide                                                         |
| Mineralocorticoid receptor antagonists | Epleronone, Spironolactone, Spironolactone micronized                                     |
| Potassium-sparing diuretics            | Amiloride HCl, Amiloride/hydrochlorothiazide, Triamterene, Triamterene/hydrochlorothiazid |
| Renin inhibitors                       | Aliskiren hemifumarate, Aliskiren/hydrochlorothiazide                                     |

### Additional drug classes of interest

| Therapeutic Class            | Generic Name                                                                                                                                                                                                                                                                                                                                                                                                                                                                                                                                                                                                                                                                                                                                                                                                                                         |
|------------------------------|------------------------------------------------------------------------------------------------------------------------------------------------------------------------------------------------------------------------------------------------------------------------------------------------------------------------------------------------------------------------------------------------------------------------------------------------------------------------------------------------------------------------------------------------------------------------------------------------------------------------------------------------------------------------------------------------------------------------------------------------------------------------------------------------------------------------------------------------------|
| Oral anticoagulants          | Apixaban, Rivaroxaban, Betrixaban maleate, Edoxaban tosylate, Dabigatran etexilate mesylate, Warfarin sodium                                                                                                                                                                                                                                                                                                                                                                                                                                                                                                                                                                                                                                                                                                                                         |
| Statins                      | Atorvastatin calcium, Simvastatin, Pitavastatin calcium, Pitavastatin magnesium, Amlodipine/atorvastatin, Lovastatin, Fluvastatin sodium, Niacin/lovastatin, Pravastatin sodium, Rosuvastatin calcium, Niacin/simvastatin                                                                                                                                                                                                                                                                                                                                                                                                                                                                                                                                                                                                                            |
| Other Lipid Lowering Agents  | Fenofibrate, Fenofibrate micronized, Fenofibrate nanocrystallized, Ezetimibe, Ezetimibe/simvastatin, Cholestyramine/aspartame, Colesevelam HCl, Cholestyramine (with sugar), Colestipol HCl, Niacin/simvastatin, Niacin/lovastatin, Niacin                                                                                                                                                                                                                                                                                                                                                                                                                                                                                                                                                                                                           |
| Oral Glucose Lowering Agents | Acarbose, Miglitol, Metformin HCl, Sitagliptin phosphate, Linagliptin, Sitagliptin phos/metformin HCl, Saxagliptin HCl, Saxagliptin HCl/metformin HCl, Linagliptin/metformin HCl, Alogliptin benzoate, Alogliptin benz/metformin HCl, Alogliptin benz/pioglitazone, Repaglinide, Nateglinide, Empagliflozin, Canagliflozin, Empagliflozin/metformin HCl, Canagliflozin/metformin HCl, Dapagliflozin propanediol, Empagliflozin/linagliptin, Dapagliflozin/metformin HCl, Ertugliflozin pidolate, Ertugliflozin/sitagliptin, Dapagliflozin/saxagliptin HCl, Ertugliflozin/metformin, Glipizide, Glimepiride, Glyburide, Glipizide/metformin HCl, Glyburide/metformin HCl, Glyburide, micronized, Glyburide micronized, Tolbutamide, Tolazamide, Pioglitazone HCl, Pioglitazone HCl/metformin HCl, Pioglitazone HCl/glimepiride, Rosiglitazone maleate |
| Insulins                     | Insulin nph hum/reg insulin hm, Insulin nph human isophane, Insulin glargine hum.rec.anlog, Insulin detemir, Insulin glargine,hum.rec.anlog, Insulin degludec, Insulin glargine/lixisenatide,<br><br>Insulin degludec/liraglutide, Insulin lispro, Insulin lispro protamin/lispro, Insulin aspart, Insulin aspart prot/insuln asp, Insulin aspart (niacinamide), Insulin glulisine, Insulin regular, human, Insulin regular human, Insulin regular human, Insulin regular, human                                                                                                                                                                                                                                                                                                                                                                     |

**Table S3. Characteristics of the primary Outpatient and Inpatient study cohorts, Medicare verses Commercial.**

| Variable                                     | Outpatient       |                    |                  |                                      | Inpatient        |                    |                  |                                      |
|----------------------------------------------|------------------|--------------------|------------------|--------------------------------------|------------------|--------------------|------------------|--------------------------------------|
|                                              | Overall          | Medicare Advantage | Commercial       | p-value<br>Medicare vs<br>Commercial | Overall          | Medicare Advantage | Commercial       | p-value<br>Medicare vs<br>Commercial |
| Number of Patients<br>(% of population)      | 2263 (100%)      | 1467 (64.8%)       | 796 (35.2%)      | <0.0001                              | 7933 (100%)      | 7296 (92.0%)       | 637 (8.0%)       | <0.0001                              |
| Age, median (IQR)                            | 69.0 (59.0–78.0) | 75.0 (70.0–82.0)   | 56.0 (49.0–61.0) | <0.0001                              | 77.0 (69.0–85.0) | 78.0 (71.0–85.0)   | 57.0 (51.0–62.0) | <0.0001                              |
| Female                                       | 1189 (52.5%)     | 828 (56.4%)        | 361 (45.4%)      | <0.0001                              | 4332 (54.6%)     | 4075 (55.9%)       | 257 (40.3%)      | <0.0001                              |
| Comorbid Conditions                          |                  |                    |                  |                                      |                  |                    |                  |                                      |
| Diabetes without<br>chronic<br>complications | 911 (40.3%)      | 669 (45.6%)        | 242 (30.4%)      | <0.0001                              | 4022 (50.7%)     | 3755 (51.5%)       | 267 (41.9%)      | <0.0001                              |
| Myocardial<br>infarction                     | 81 (3.6%)        | 60 (4.1%)          | 21 (2.6%)        | 0.098                                | 425 (5.4%)       | 402 (5.5%)         | 23 (3.6%)        | 0.051                                |
| Chronic heart failure                        | 326 (14.4%)      | 295 (20.1%)        | 31 (3.9%)        | <0.0001                              | 2469 (31.1%)     | 2383 (32.7%)       | 86 (13.5%)       | <0.0001                              |
| Chronic pulmonary<br>disease                 | 410 (18.1%)      | 310 (21.1%)        | 100 (12.6%)      | <0.0001                              | 2266 (28.6%)     | 2144 (29.4%)       | 122 (19.2%)      | <0.0001                              |
| Peptic ulcer disease                         | 19 (0.8%)        | **                 | **               | 0.12                                 | 133 (1.7%)       | 122 (1.7%)         | 11 (1.7%)        | 0.95                                 |
| Acquired<br>immunodeficiency<br>syndrome     | 22 (1.0%)        | **                 | **               | 0.43                                 | 33 (0.4%)        | **                 | **               | <0.0001                              |
| Rheumatic disease                            | 120 (5.3%)       | 82 (5.6%)          | 38 (4.8%)        | 0.47                                 | 435 (5.5%)       | 396 (5.4%)         | 39 (6.1%)        | 0.52                                 |
| Diabetes with<br>chronic<br>complications    | 625 (27.6%)      | 481 (32.8%)        | 144 (18.1%)      | <0.0001                              | 3081 (38.8%)     | 2907 (39.8%)       | 174 (27.3%)      | <0.0001                              |
| Metastatic solid<br>tumor                    | 20 (0.9%)        | **                 | **               | 0.49                                 | 146 (1.8%)       | 131 (1.8%)         | 15 (2.4%)        | 0.39                                 |

|                                               |               |               |               |         |               |               |               |         |
|-----------------------------------------------|---------------|---------------|---------------|---------|---------------|---------------|---------------|---------|
| Hemiplegia and paraplegia                     | 92 (4.1%)     | 88 (6.0%)     | 4 (0.5%)      | <0.0001 | 596 (7.5%)    | **            | **            | <0.0001 |
| Mild liver disease                            | 106 (4.7%)    | 67 (4.6%)     | 39 (4.9%)     | 0.80    | 477 (6.0%)    | 420 (5.8%)    | 57 (8.9%)     | 0.0016  |
| Any malignancy without metastasis             | 181 (8.0%)    | 139 (9.5%)    | 42 (5.3%)     | 0.00059 | 923 (11.6%)   | 870 (11.9%)   | 53 (8.3%)     | 0.0079  |
| Moderate to severe liver disease              | **            | **            | **            | 0.24    | 66 (0.8%)     | **            | **            | 0.59    |
| Dementia                                      | 250 (11.0%)   | 249 (17.0%)   | 1 (0.1%)      | <0.0001 | 1645 (20.7%)  | **            | **            | <0.0001 |
| Perivascular Disease                          | 467 (20.6%)   | 428 (29.2%)   | 39 (4.9%)     | <0.0001 | 2687 (33.9%)  | 2611 (35.8%)  | 76 (11.9%)    | <0.0001 |
| Renal disease                                 | 359 (15.9%)   | 318 (21.7%)   | 41 (5.2%)     | <0.0001 | 2351 (29.6%)  | 2252 (30.9%)  | 99 (15.5%)    | <0.0001 |
| Cerebrovascular disease                       | 289 (12.8%)   | 258 (17.6%)   | 31 (3.9%)     | <0.0001 | 1744 (22.0%)  | 1694 (23.2%)  | 50 (7.8%)     | <0.0001 |
| Charlson score, median (IQR)                  | 2.0 (0.0–3.0) | 2.0 (1.0–4.0) | 0.0 (0.0–1.0) | <0.0001 | 3.0 (2.0–5.0) | 3.0 (2.0–5.0) | 1.0 (0.0–3.0) | <0.0001 |
| Drug Therapy                                  |               |               |               |         |               |               |               |         |
| Antihypertensives                             |               |               |               |         |               |               |               |         |
| Angiotensin converting enzyme inhibitor       | 722 (31.9%)   | 434 (29.6%)   | 288 (36.2%)   | 0.0015  | 2361 (29.8%)  | 2152 (29.5%)  | 209 (32.8%)   | 0.087   |
| Angiotensin II receptor blocker               | 731 (32.3%)   | 452 (30.8%)   | 279 (35.1%)   | 0.044   | 2226 (28.1%)  | 1991 (27.3%)  | 235 (36.9%)   | <0.0001 |
| Beta blocking agent                           | 911 (40.3%)   | 682 (46.5%)   | 229 (28.8%)   | <0.0001 | 4277 (53.9%)  | 4028 (55.2%)  | 249 (39.1%)   | <0.0001 |
| Calcium channel blockers, non-dihydropyridine | 99 (4.4%)     | 73 (5.0%)     | 26 (3.3%)     | 0.073   | 3438 (43.3%)  | 3173 (43.5%)  | 265 (41.6%)   | 0.38    |
| Calcium channel blockers, dihydropyridine     | 813 (35.9%)   | 549 (37.4%)   | 264 (33.2%)   | 0.049   | 2972 (37.5%)  | 2727 (37.4%)  | 245 (38.5%)   | 0.62    |
| Thiazide or thiazide-like diuretic            | 709 (31.3%)   | 395 (26.9%)   | 314 (39.4%)   | <0.0001 | 1650 (20.8%)  | 1425 (19.5%)  | 225 (35.3%)   | <0.0001 |
| Loop diuretic                                 | 328 (14.5%)   | 300 (20.4%)   | 28 (3.5%)     | <0.0001 | 2400 (30.3%)  | 2323 (31.8%)  | 77 (12.1%)    | <0.0001 |

|                                              |               |               |               |         |               |               |               |         |
|----------------------------------------------|---------------|---------------|---------------|---------|---------------|---------------|---------------|---------|
| Central alpha agent agonist                  | 54 (2.4%)     | 43 (2.9%)     | 11 (1.4%)     | 0.031   | 303 (3.8%)    | 284 (3.9%)    | 19 (3.0%)     | 0.30    |
| Potassium sparing diuretic                   | 56 (2.5%)     | 35 (2.4%)     | 21 (2.6%)     | 0.82    | 112 (1.4%)    | 93 (1.3%)     | 19 (3.0%)     | 0.00087 |
| Mineralocorticoid receptor antagonist        | 85 (3.8%)     | 67 (4.6%)     | 18 (2.3%)     | 0.0083  | 435 (5.5%)    | 398 (5.5%)    | 37 (5.8%)     | 0.78    |
| Renin inhibitors                             | 0 (0.0%)      | 0 (0.0%)      | 0 (0.0%)      | <0.0001 | 0 (0.0%)      | 0 (0.0%)      | 0 (0.0%)      | <0.0001 |
| Alpha adrenergic blocking agents             | 40 (1.8%)     | **            | **            | 0.0042  | 247 (3.1%)    | 235 (3.2%)    | 12 (1.9%)     | 0.081   |
| Direct vasodilators                          | 99 (4.4%)     | **            | **            | <0.0001 | 515 (6.5%)    | 493 (6.8%)    | 22 (3.5%)     | 0.0016  |
| <i>Place in therapy</i>                      |               |               |               |         |               |               |               |         |
| First-line drug user                         | 1964 (86.8%)  | 1238 (84.4%)  | 726 (91.2%)   | <0.0001 | 6399 (80.7%)  | 5822 (79.8%)  | 577 (90.6%)   | <0.0001 |
| Second-line drug user                        | 1135 (50.2%)  | 864 (58.9%)   | 271 (34.0%)   | <0.0001 | 5478 (69.1%)  | 5169 (70.8%)  | 309 (48.5%)   | <0.0001 |
| Number of antihypertensive classes           |               |               |               |         |               |               |               |         |
| 1                                            | 822 (36.3%)   | 500 (34.1%)   | 322 (40.5%)   | 0.0031  | 2322 (29.3%)  | 2113 (29.0%)  | 209 (32.8%)   | 0.045   |
| 2                                            | 780 (34.5%)   | 473 (32.2%)   | 307 (38.6%)   | 0.0029  | 2625 (33.1%)  | 2400 (32.9%)  | 225 (35.3%)   | 0.23    |
| 3+                                           | 661 (29.2%)   | 494 (33.7%)   | 167 (21.0%)   | <0.0001 | 2986 (37.6%)  | 2783 (38.1%)  | 203 (31.9%)   | 0.0020  |
| Number of Anti-HTN agents used: median (IQR) | 2.0 (1.0–3.0) | 2.0 (1.0–3.0) | 2.0 (1.0–2.0) | <0.0001 | 2.0 (1.0–3.0) | 2.0 (1.0–3.0) | 2.0 (1.0–3.0) | 0.0059  |
| Other Drug Therapies                         |               |               |               |         |               |               |               |         |
| Statins                                      | 1210 (53.5%)  | 892 (60.8%)   | 318 (39.9%)   | <0.0001 | 4772 (60.2%)  | 4498 (61.7%)  | 274 (43.0%)   | <0.0001 |
| Other lipid-lowering agent                   | 113 (5.0%)    | 82 (5.6%)     | 31 (3.9%)     | 0.096   | 423 (5.3%)    | 385 (5.3%)    | 38 (6.0%)     | 0.52    |
| Oral anticoagulants                          | 201 (8.9%)    | 179 (12.2%)   | 22 (2.8%)     | <0.0001 | 1375 (17.3%)  | 1332 (18.3%)  | 43 (6.8%)     | <0.0001 |
| Insulin                                      | 215 (9.5%)    | 165 (11.2%)   | 50 (6.3%)     | 0.00016 | 1373 (17.3%)  | 1298 (17.8%)  | 75 (11.8%)    | 0.00015 |

|                               |             |             |             |      |              |              |             |      |
|-------------------------------|-------------|-------------|-------------|------|--------------|--------------|-------------|------|
| Oral antihyperglycemic agents | 581 (25.7%) | 389 (26.5%) | 192 (24.1%) | 0.23 | 2188 (27.6%) | 2000 (27.4%) | 188 (29.5%) | 0.27 |
|-------------------------------|-------------|-------------|-------------|------|--------------|--------------|-------------|------|

---

\*\* Cells with values < 11 were suppressed in accordance with the Centers for Medicare and Medicare Services cell size suppression policy for values from 1 to 10.

**Table S4. Characteristics of the secondary outpatient cohort. The cohort includes individuals who had a positive test for SARS-CoV-2 in the outpatient setting between May and August, 2020.**

| Variable           | Antihypertensive Drug Cohorts |                    |                    |                    | p-value                |              |                      |
|--------------------|-------------------------------|--------------------|--------------------|--------------------|------------------------|--------------|----------------------|
|                    | Overall                       | ACE inhibitor      | ARB                | Other              | ACE inhibitor vs Other | ARB vs Other | ACE inhibitor vs ARB |
| Number of Patients | 5552 (100%)                   | 2152 (38.8%)       | 1808 (32.6%)       | 1592 (28.7%)       | --                     | --           | --                   |
| Age, median (IQR)  | 65.0 (54.0 - 74.0)            | 63.0 (54.0 - 73.0) | 66.0 (55.0 - 74.0) | 67.0 (54.0 - 77.0) | <.0001                 | 0.15         | 0.00020              |
| 18 to 30 y         | 55 (1.0%)                     | 19 (0.9%)          | 15 (0.8%)          | 21 (1.3%)          | 0.26                   | 0.22         | 0.99                 |
| 31 to 40 y         | 234 (4.2%)                    | 97 (4.5%)          | 56 (3.1%)          | 81 (5.1%)          | 0.45                   | 0.0043       | 0.027                |
| 41 to 50 y         | 715 (12.9%)                   | 300 (13.9%)        | 201 (11.1%)        | 214 (13.4%)        | 0.70                   | 0.044        | 0.0089               |
| 51 to 60 y         | 1210 (21.8%)                  | 488 (22.7%)        | 412 (22.8%)        | 310 (19.5%)        | 0.020                  | 0.021        | 0.96                 |
| 61 to 70 y         | 1332 (24.0%)                  | 560 (26.0%)        | 463 (25.6%)        | 309 (19.4%)        | <.0001                 | <.0001       | 0.79                 |
| 71 to 80 y         | 1307 (23.5%)                  | 490 (22.8%)        | 459 (25.4%)        | 358 (22.5%)        | 0.87                   | 0.053        | 0.059                |
| > 80 y             | 699 (12.6%)                   | 198 (9.2%)         | 202 (11.2%)        | 299 (18.8%)        | <.0001                 | <.0001       | 0.046                |
| Female sex         | 2974 (53.6%)                  | 1020 (47.4%)       | 978 (54.1%)        | 976 (61.3%)        | <.0001                 | <.0001       | <.0001               |
| Medicare Advantage | 3230 (58.2%)                  | 1181 (54.9%)       | 1077 (59.6%)       | 972 (61.1%)        | 0.00018                | 0.40         | 0.0033               |
| Location           |                               |                    |                    |                    |                        |              |                      |
| Urban              | 2130 (38.4%)                  | 800 (37.2%)        | 688 (38.1%)        | 642 (40.3%)        | 0.054                  | 0.19         | 0.59                 |
| Rural              | 1326 (23.9%)                  | 529 (24.6%)        | 431 (23.8%)        | 366 (23.0%)        | 0.28                   | 0.59         | 0.61                 |
| Suburban           | 2056 (37.0%)                  | 809 (37.6%)        | 672 (37.2%)        | 575 (36.1%)        | 0.37                   | 0.55         | 0.81                 |
| Unknown            | **                            | 14 (0.7%)          | 17 (0.9%)          | **                 | 0.91                   | 0.29         | 0.40                 |
| Race *             |                               |                    |                    |                    |                        |              |                      |
| Caucasian          | 1938 (34.9%)                  | 730 (33.9%)        | 604 (33.4%)        | 604 (37.9%)        | 0.012                  | 0.0065       | 0.76                 |

|                                |              |              |              |             |         |        |         |
|--------------------------------|--------------|--------------|--------------|-------------|---------|--------|---------|
| African American               | 794 (14.3%)  | 253 (11.8%)  | 285 (15.8%)  | 256 (16.1%) | 0.00016 | 0.84   | 0.00030 |
| Hispanic                       | 307 (5.5%)   | 124 (5.8%)   | 119 (6.6%)   | 64 (4.0%)   | 0.019   | 0.0013 | 0.32    |
| Asian                          | 30 (0.5%)    | **           | 15 (0.8%)    | **          | 0.56    | 0.34   | 0.056   |
| Native American                | **           | 0 (0.0%)     | **           | **          | 0.88    | 0.54   | 0.93    |
| Other                          | 45 (0.8%)    | 18 (0.8%)    | 18 (1.0%)    | 9 (0.6%)    | 0.44    | 0.22   | 0.72    |
| Unknown                        | 2436 (43.9%) | 1020 (47.4%) | 766 (42.4%)  | 650 (40.8%) | <.0001  | 0.38   | 0.0017  |
| Geography                      |              |              |              |             |         |        |         |
| Region of Test Site            |              |              |              |             |         |        |         |
| Northeast                      | 585 (10.5%)  | 205 (9.5%)   | 134 (7.4%)   | 246 (15.5%) | <.0001  | <.0001 | 0.021   |
| South                          | 3714 (66.9%) | 1415 (65.8%) | 1300 (71.9%) | 999 (62.8%) | 0.063   | <.0001 | <.0001  |
| Midwest                        | 423 (7.6%)   | 168 (7.8%)   | 117 (6.5%)   | 138 (8.7%)  | 0.37    | 0.018  | 0.12    |
| West                           | 609 (11.0%)  | 280 (13.0%)  | 187 (10.3%)  | 142 (8.9%)  | 0.00011 | 0.18   | 0.011   |
| Unknown                        | 221 (4.0%)   | 84 (3.9%)    | 70 (3.9%)    | 67 (4.2%)   | 0.70    | 0.68   | 0.98    |
| State of Test Site             |              |              |              |             |         |        |         |
| Texas                          | 1091 (19.7%) | 481 (22.4%)  | 399 (22.1%)  | 211 (13.3%) | <.0001  | <.0001 | 0.86    |
| Florida                        | 1047 (18.9%) | 360 (16.7%)  | 375 (20.7%)  | 312 (19.6%) | 0.027   | 0.43   | 0.0014  |
| Arizona                        | 412 (7.4%)   | 190 (8.8%)   | 120 (6.6%)   | 102 (6.4%)  | 0.0076  | 0.84   | 0.012   |
| North Carolina                 | 406 (7.3%)   | 151 (7.0%)   | 125 (6.9%)   | 130 (8.2%)  | 0.21    | 0.19   | 0.95    |
| Georgia                        | 335 (6.0%)   | 106 (4.9%)   | 110 (6.1%)   | 119 (7.5%)  | 0.0015  | 0.12   | 0.13    |
| Other                          | 2124 (38.3%) | 819 (38.1%)  | 632 (35.0%)  | 673 (42.3%) | 0.010   | <.0001 | 0.047   |
| Unknown                        | 137 (2.5%)   | 45 (2.1%)    | 47 (2.6%)    | 45 (2.8%)   | 0.18    | 0.76   | 0.34    |
| Comorbid Conditions            |              |              |              |             |         |        |         |
| Diabetes without complications | 2310 (41.6%) | 1004 (46.7%) | 807 (44.6%)  | 499 (31.3%) | <.0001  | <.0001 | 0.22    |
| Myocardial infarction          | 165 (3.0%)   | 53 (2.5%)    | 46 (2.5%)    | 66 (4.1%)   | 0.0050  | 0.012  | 0.95    |
| Chronic heart failure          | 675 (12.2%)  | 199 (9.2%)   | 220 (12.2%)  | 256 (16.1%) | <.0001  | 0.0012 | 0.0034  |

|                                              |                 |                 |                 |                 |        |         |         |
|----------------------------------------------|-----------------|-----------------|-----------------|-----------------|--------|---------|---------|
| Chronic pulmonary disease                    | 845 (15.2%)     | 270 (12.5%)     | 299 (16.5%)     | 276 (17.3%)     | <.0001 | 0.57    | 0.00043 |
| Peptic ulcer disease                         | 41 (0.7%)       | 11 (0.5%)       | 18 (1.0%)       | 12 (0.8%)       | 0.47   | 0.57    | 0.11    |
| AIDS                                         | 21 (0.4%)       | 11 (0.5%)       | **              | **              | 0.72   | 0.60    | 0.22    |
| Rheumatologic disease                        | 321 (5.8%)      | 105 (4.9%)      | 121 (6.7%)      | 95 (6.0%)       | 0.16   | 0.43    | 0.017   |
| Diabetes, chronic complications              | 1714 (30.9%)    | 735 (34.2%)     | 613 (33.9%)     | 366 (23.0%)     | <.0001 | <.0001  | 0.90    |
| Metastatic cancer                            | 31 (0.6%)       | 13 (0.6%)       | 7 (0.4%)        | 11 (0.7%)       | 0.90   | 0.33    | 0.46    |
| Hemiplegia or paraplegia                     | 155 (2.8%)      | 61 (2.8%)       | 36 (2.0%)       | 58 (3.6%)       | 0.19   | 0.0047  | 0.11    |
| Liver disease, mild                          | 356 (6.4%)      | 131 (6.1%)      | 118 (6.5%)      | 107 (6.7%)      | 0.47   | 0.87    | 0.62    |
| Solid tumor without metastases               | 397 (7.2%)      | 136 (6.3%)      | 138 (7.6%)      | 123 (7.7%)      | 0.11   | 0.97    | 0.12    |
| Liver disease, moderate to severe            | **              | **              | 11 (0.6%)       | 15 (0.9%)       | 0.0028 | 0.36    | 0.058   |
| Dementia                                     | 353 (6.4%)      | 113 (5.3%)      | 62 (3.4%)       | 178 (11.2%)     | <.0001 | <.0001  | 0.0069  |
| Peripheral vascular disease                  | 961 (17.3%)     | 292 (13.6%)     | 318 (17.6%)     | 351 (22.0%)     | <.0001 | 0.0013  | 0.00057 |
| Renal failure, moderate to severe            | 860 (15.5%)     | 269 (12.5%)     | 306 (16.9%)     | 285 (17.9%)     | <.0001 | 0.48    | <.0001  |
| Cerebrovascular disease                      | 551 (9.9%)      | 171 (7.9%)      | 183 (10.1%)     | 197 (12.4%)     | <.0001 | 0.043   | 0.020   |
| Charlson Score, median (IQR)                 | 1.0 (0.0 - 3.0) | 1.0 (0.0 - 3.0) | 2.0 (0.0 - 3.0) | 1.0 (0.0 - 3.0) | 0.0050 | 0.91    | 0.0017  |
| Drug Therapy                                 |                 |                 |                 |                 |        |         |         |
| Antihypertensives                            |                 |                 |                 |                 |        |         |         |
| Beta blockers                                | 2043 (36.8%)    | 598 (27.8%)     | 611 (33.8%)     | 834 (52.4%)     | <.0001 | <.0001  | <.0001  |
| Non-dihydropyridine calcium channel blockers | 195 (3.5%)      | 53 (2.5%)       | 54 (3.0%)       | 88 (5.5%)       | <.0001 | 0.00031 | 0.36    |
| Dihydropyridine calcium channel blockers     | 1656 (29.8%)    | 502 (23.3%)     | 538 (29.8%)     | 616 (38.7%)     | <.0001 | <.0001  | <.0001  |
| Thiazide or thiazide-like diuretics          | 1857 (33.4%)    | 674 (31.3%)     | 786 (43.5%)     | 397 (24.9%)     | <.0001 | <.0001  | <.0001  |
| Loop diuretics                               | 663 (11.9%)     | 193 (9.0%)      | 190 (10.5%)     | 280 (17.6%)     | <.0001 | <.0001  | 0.11    |



|                                           |                 |                 |                 |                 |        |         |         |
|-------------------------------------------|-----------------|-----------------|-----------------|-----------------|--------|---------|---------|
| Centrally acting alpha agonists           | 124 (2.2%)      | 35 (1.6%)       | 42 (2.3%)       | 47 (3.0%)       | 0.0086 | 0.30    | 0.14    |
| Potassium sparing diuretics               | 121 (2.2%)      | 26 (1.2%)       | 22 (1.2%)       | 73 (4.6%)       | <.0001 | <.0001  | 0.90    |
| Mineralocorticoid aldosterone antagonists | 196 (3.5%)      | 43 (2.0%)       | 72 (4.0%)       | 81 (5.1%)       | <.0001 | 0.14    | 0.00031 |
| Renin inhibitors                          | **              | 0 (0.0%)        | 0 (0.0%)        | **              | 0.88   | 0.95    | --      |
| Alpha adrenergic blocking agents          | 111 (2.0%)      | 37 (1.7%)       | 29 (1.6%)       | 45 (2.8%)       | 0.030  | 0.020   | 0.87    |
| Direct vasodilators                       | 167 (3.0%)      | 35 (1.6%)       | 71 (3.9%)       | 61 (3.8%)       | <.0001 | 0.96    | <.0001  |
| Place in Therapy                          |                 |                 |                 |                 |        |         |         |
| First Line Drug User                      | 4941 (89.0%)    | 2152            | 1808            | 981 (61.6%)     | <.0001 | <.0001  |         |
| Second Line Drug User                     | 2560 (46.1%)    | 735 (34.2%)     | 743 (41.1%)     | 1082 (68.0%)    | <.0001 | <.0001  | <.0001  |
| Number of Antihypertensive Classes        |                 |                 |                 |                 |        |         |         |
| 1                                         | 2118 (38.1%)    | 757 (35.2%)     | 431 (23.8%)     | 930 (58.4%)     | <.0001 | <.0001  | <.0001  |
| 2                                         | 1948 (35.1%)    | 823 (38.2%)     | 670 (37.1%)     | 455 (28.6%)     | <.0001 | <.0001  | 0.46    |
| 3+                                        | 1486 (26.8%)    | 572 (26.6%)     | 707 (39.1%)     | 207 (13.0%)     | <.0001 | <.0001  | <.0001  |
| Number, median (IQR)                      | 2.0 (1.0 - 3.0) | 2.0 (1.0 - 3.0) | 2.0 (2.0 - 3.0) | 1.0 (1.0 - 2.0) | <.0001 | <.0001  | <.0001  |
| Other Drug Therapies                      |                 |                 |                 |                 |        |         |         |
| Statins                                   | 2848 (51.3%)    | 1182 (54.9%)    | 978 (54.1%)     | 688 (43.2%)     | <.0001 | <.0001  | 0.62    |
| Other lipid lowering agents               | 267 (4.8%)      | 108 (5.0%)      | 94 (5.2%)       | 65 (4.1%)       | 0.20   | 0.15    | 0.85    |
| Oral anticoagulants                       | 394 (7.1%)      | 114 (5.3%)      | 129 (7.1%)      | 151 (9.5%)      | <.0001 | 0.015   | 0.020   |
| Insulins                                  | 512 (9.2%)      | 201 (9.3%)      | 197 (10.9%)     | 114 (7.2%)      | 0.021  | 0.00021 | 0.12    |
| Oral antihyperglycemic agents             | 1629 (29.3%)    | 769 (35.7%)     | 602 (33.3%)     | 258 (16.2%)     | <.0001 | <.0001  | 0.12    |

Follow-up

|                                       |                    |                    |                    |                    |        |        |       |
|---------------------------------------|--------------------|--------------------|--------------------|--------------------|--------|--------|-------|
| Follow-up days, median (IQR)          | 35.0 (24.0 - 54.0) | 35.0 (23.8 - 52.2) | 33.0 (23.0 - 50.0) | 37.0 (24.0 - 65.0) | <.0001 | <.0001 | 0.044 |
| Test to hospitalization, median (IQR) | 6.0 (3.0 - 10.0)   | 6.0 (3.0 - 11.0)   | 6.0 (3.0 - 9.0)    | 7.0 (3.0 - 13.0)   | 0.18   | 0.014  | 0.24  |
| Total hospitalized                    | 624 (11.2%)        | 233 (10.8%)        | 182 (10.1%)        | 209 (13.1%)        | 0.035  | 0.0062 | 0.47  |

\* Race is unknown in all commercially insured enrollees.

\*\* Cells with values < 11 were suppressed in accordance with the Centers for Medicare and Medicare Services cell size suppression policy for values from 1 to 10.

**Table S5. Characteristics of the secondary inpatient cohort. The cohort includes individuals who were hospitalized with COVID-19 between May and August, 2020.**

| Variable           | Cohort             |                    |                    |                    | p-value                |              |                      |
|--------------------|--------------------|--------------------|--------------------|--------------------|------------------------|--------------|----------------------|
|                    | Overall            | ACE inhibitor      | ARB                | Other              | ACE inhibitor vs Other | ARB vs Other | ACE inhibitor vs ARB |
| Number of Patients | 8114 (100%)        | 2663 (32.8%)       | 2325 (28.7%)       | 3126 (38.5%)       |                        |              |                      |
| Age, median (IQR)  | 76.0 (68.0 - 84.0) | 75.0 (67.0 - 83.0) | 74.0 (67.0 - 82.0) | 77.5 (69.0 - 86.0) | <.0001                 | <.0001       | 0.70                 |
| Age Range          |                    |                    |                    |                    |                        |              |                      |
| 18 to 30 y         | 11 (0.1%)          | **                 | **                 | **                 | 0.58                   | 0.82         | 0.56                 |
| 31 to 40 y         | 45 (0.6%)          | 17 (0.6%)          | 11 (0.5%)          | 17 (0.5%)          | 0.77                   | 0.87         | 0.56                 |
| 41 to 50 y         | 237 (2.9%)         | 88 (3.3%)          | 64 (2.8%)          | 85 (2.7%)          | 0.22                   | 0.99         | 0.29                 |
| 51 to 60 y         | 715 (8.8%)         | 260 (9.8%)         | 222 (9.5%)         | 233 (7.5%)         | 0.0020                 | 0.0066       | 0.83                 |
| 61 to 70 y         | 1686 (20.8%)       | 584 (21.9%)        | 536 (23.1%)        | 566 (18.1%)        | 0.00032                | <.0001       | 0.36                 |
| 71 to 80 y         | 2652 (32.7%)       | 894 (33.6%)        | 802 (34.5%)        | 956 (30.6%)        | 0.016                  | 0.0025       | 0.51                 |
| > 80 y             | 2768 (34.1%)       | 818 (30.7%)        | 686 (29.5%)        | 1264 (40.4%)       | <.0001                 | <.0001       | 0.37                 |
| Female sex         | 4783 (58.9%)       | 1432 (53.8%)       | 1412 (60.7%)       | 1939 (62.0%)       | <.0001                 | 0.34         | <.0001               |
| Medicare Advantage | 7291 (89.9%)       | 2353 (88.4%)       | 2026 (87.1%)       | 2912 (93.2%)       | <.0001                 | <.0001       | 0.20                 |
| Location           |                    |                    |                    |                    |                        |              |                      |
| Urban              | 2817 (34.7%)       | 892 (33.5%)        | 834 (35.9%)        | 1091 (34.9%)       | 0.27                   | 0.48         | 0.084                |
| Rural              | 2362 (29.1%)       | 820 (30.8%)        | 692 (29.8%)        | 850 (27.2%)        | 0.0028                 | 0.040        | 0.45                 |
| Suburban           | 2915 (35.9%)       | 942 (35.4%)        | 793 (34.1%)        | 1180 (37.7%)       | 0.066                  | 0.0062       | 0.36                 |
| Unknown            | 20 (0.2%)          | **                 | **                 | **                 | 0.27                   | 0.62         | 0.80                 |
| Race *             |                    |                    |                    |                    |                        |              |                      |
| Caucasian          | 4304 (53.0%)       | 1435 (53.9%)       | 1062 (45.7%)       | 1807 (57.8%)       | 0.0030                 | <.0001       | <.0001               |
| African American   | 2305 (28.4%)       | 679 (25.5%)        | 737 (31.7%)        | 889 (28.4%)        | 0.013                  | 0.010        | <.0001               |

|                                |              |              |              |              |        |         |         |
|--------------------------------|--------------|--------------|--------------|--------------|--------|---------|---------|
| Hispanic                       | 321 (4.0%)   | 116 (4.4%)   | 115 (4.9%)   | 90 (2.9%)    | 0.0032 | <.0001  | 0.36    |
| Asian                          | 53 (0.7%)    | 19 (0.7%)    | 13 (0.6%)    | 21 (0.7%)    | 0.97   | 0.73    | 0.61    |
| Native American                | 13 (0.2%)    | **           | **           | **           | 0.38   | 0.96    | 0.26    |
| Other                          | 90 (1.1%)    | 31 (1.2%)    | 32 (1.4%)    | 27 (0.9%)    | 0.31   | 0.094   | 0.59    |
| Unknown                        | 1028 (12.7%) | 376 (14.1%)  | 364 (15.7%)  | 288 (9.2%)   | <.0001 | <.0001  | 0.14    |
| Geographic Region              |              |              |              |              |        |         |         |
| Region of Inpatient Facility   |              |              |              |              |        |         |         |
| Northeast                      | 1228 (15.1%) | 387 (14.5%)  | 239 (10.3%)  | 602 (19.3%)  | <.0001 | <.0001  | <.0001  |
| South                          | 5022 (61.9%) | 1630 (61.2%) | 1607 (69.1%) | 1785 (57.1%) | 0.0017 | <.0001  | <.0001  |
| Midwest                        | 1413 (17.4%) | 480 (18.0%)  | 354 (15.2%)  | 579 (18.5%)  | 0.65   | 0.0016  | 0.0092  |
| West                           | 450 (5.5%)   | 165 (6.2%)   | 125 (5.4%)   | 160 (5.1%)   | 0.086  | 0.72    | 0.24    |
| Unknown                        | **           | **           | 0 (0.0%)     | 0 (0.0%)     | 0.94   | <.0001  | 0.95    |
| State of Inpatient Facility    |              |              |              |              |        |         |         |
| Florida                        | 1208 (14.9%) | 368 (13.8%)  | 440 (18.9%)  | 400 (12.8%)  | 0.27   | <.0001  | <.0001  |
| Georgia                        | 894 (11.0%)  | 263 (9.9%)   | 274 (11.8%)  | 357 (11.4%)  | 0.064  | 0.71    | 0.034   |
| New York                       | 354 (4.4%)   | 95 (3.6%)    | 70 (3.0%)    | 189 (6.0%)   | <.0001 | <.0001  | 0.31    |
| Texas                          | 834 (10.3%)  | 318 (11.9%)  | 264 (11.4%)  | 252 (8.1%)   | <.0001 | <.0001  | 0.55    |
| Connecticut                    | 339 (4.2%)   | 109 (4.1%)   | 70 (3.0%)    | 160 (5.1%)   | 0.074  | 0.00017 | 0.048   |
| Other                          | 4485 (55.3%) | 1510 (56.7%) | 1207 (51.9%) | 1768 (56.6%) | 0.93   | 0.00073 | 0.00078 |
| Unknown                        | 0 (0.0%)     | 0 (0.0%)     | 0 (0.0%)     | 0 (0.0%)     | <.0001 | <.0001  | <.0001  |
| Comorbid Conditions            |              |              |              |              |        |         |         |
| Diabetes without complications | 4394 (54.2%) | 1575 (59.1%) | 1340 (57.6%) | 1479 (47.3%) | <.0001 | <.0001  | 0.29    |
| Myocardial infarction          | 390 (4.8%)   | 100 (3.8%)   | 123 (5.3%)   | 167 (5.3%)   | 0.0050 | 0.98    | 0.011   |
| Chronic heart failure          | 2378 (29.3%) | 642 (24.1%)  | 653 (28.1%)  | 1083 (34.6%) | <.0001 | <.0001  | 0.0016  |
| Chronic pulmonary disease      | 2249 (27.7%) | 633 (23.8%)  | 650 (28.0%)  | 966 (30.9%)  | <.0001 | 0.020   | 0.00083 |

|                                              |                 |                 |                 |                 |        |        |         |
|----------------------------------------------|-----------------|-----------------|-----------------|-----------------|--------|--------|---------|
| Peptic ulcer disease                         | 120 (1.5%)      | 36 (1.4%)       | 29 (1.2%)       | 55 (1.8%)       | 0.26   | 0.16   | 0.84    |
| AIDS                                         | 45 (0.6%)       | 11 (0.4%)       | 14 (0.6%)       | 20 (0.6%)       | 0.32   | 1.00   | 0.46    |
| Rheumatologic disease                        | 504 (6.2%)      | 134 (5.0%)      | 162 (7.0%)      | 208 (6.7%)      | 0.011  | 0.69   | 0.0047  |
| Diabetes, chronic complications              | 3493 (43.0%)    | 1232 (46.3%)    | 1076 (46.3%)    | 1185 (37.9%)    | <.0001 | <.0001 | 0.99    |
| Metastatic cancer                            | 112 (1.4%)      | 33 (1.2%)       | 33 (1.4%)       | 46 (1.5%)       | 0.52   | 0.96   | 0.67    |
| Hemiplegia or paraplegia                     | 637 (7.9%)      | 201 (7.5%)      | 130 (5.6%)      | 306 (9.8%)      | 0.0031 | <.0001 | 0.0067  |
| Liver disease, mild                          | 529 (6.5%)      | 163 (6.1%)      | 162 (7.0%)      | 204 (6.5%)      | 0.56   | 0.56   | 0.25    |
| Solid tumor without metastases               | 827 (10.2%)     | 259 (9.7%)      | 250 (10.8%)     | 318 (10.2%)     | 0.60   | 0.52   | 0.25    |
| Liver disease, moderate to severe            | 68 (0.8%)       | 17 (0.6%)       | 15 (0.6%)       | 36 (1.2%)       | 0.057  | 0.075  | 0.88    |
| Dementia                                     | 1882 (23.2%)    | 602 (22.6%)     | 375 (16.1%)     | 905 (29.0%)     | <.0001 | <.0001 | <.0001  |
| Peripheral vascular disease                  | 2698 (33.3%)    | 813 (30.5%)     | 704 (30.3%)     | 1181 (37.8%)    | <.0001 | <.0001 | 0.87    |
| Renal failure, moderate to severe            | 2540 (31.3%)    | 709 (26.6%)     | 699 (30.1%)     | 1132 (36.2%)    | <.0001 | <.0001 | 0.0078  |
| Cerebrovascular disease                      | 1748 (21.5%)    | 524 (19.7%)     | 461 (19.8%)     | 763 (24.4%)     | <.0001 | <.0001 | 0.92    |
| Charlson Score, median (IQR)                 | 3.0 (2.0 - 4.0) | 3.0 (2.0 - 4.0) | 3.0 (1.0 - 4.0) | 3.0 (2.0 - 5.0) | <.0001 | <.0001 | 0.18    |
| Drug Therapy                                 |                 |                 |                 |                 |        |        |         |
| Antihypertensives                            |                 |                 |                 |                 |        |        |         |
| Beta blockers                                | 4202 (51.8%)    | 1186 (44.5%)    | 1143 (49.2%)    | 1873 (59.9%)    | <.0001 | <.0001 | 0.0012  |
| Non-dihydropyridine calcium channel blockers | 3452 (42.5%)    | 1004 (37.7%)    | 1005 (43.2%)    | 1443 (46.2%)    | <.0001 | 0.033  | <.0001  |
| Dihydropyridine calcium channel blockers     | 3015 (37.2%)    | 889 (33.4%)     | 900 (38.7%)     | 1226 (39.2%)    | <.0001 | 0.72   | 0.00010 |
| Thiazide or thiazide-like diuretics          | 1951 (24.0%)    | 618 (23.2%)     | 840 (36.1%)     | 493 (15.8%)     | <.0001 | <.0001 | <.0001  |
| Loop diuretics                               | 2381 (29.3%)    | 639 (24.0%)     | 628 (27.0%)     | 1114 (35.6%)    | <.0001 | <.0001 | 0.016   |
| Centrally acting alpha agonists              | 287 (3.5%)      | 76 (2.9%)       | 97 (4.2%)       | 114 (3.6%)      | 0.11   | 0.36   | 0.014   |
| Potassium sparing diuretics                  | 139 (1.7%)      | 39 (1.5%)       | 29 (1.2%)       | 71 (2.3%)       | 0.032  | 0.0073 | 0.59    |

|                                           |                  |                  |                   |                  |        |        |        |
|-------------------------------------------|------------------|------------------|-------------------|------------------|--------|--------|--------|
| Mineralocorticoid aldosterone antagonists | 460 (5.7%)       | 122 (4.6%)       | 133 (5.7%)        | 205 (6.6%)       | 0.0014 | 0.23   | 0.079  |
| Renin inhibitors                          | **               | 0 (0.0%)         | **v               | **               | 0.55   | 0.80   | 0.95   |
| Alpha adrenergic blocking agents          | 255 (3.1%)       | 73 (2.7%)        | 72 (3.1%)         | 110 (3.5%)       | 0.11   | 0.43   | 0.51   |
| Direct vasodilators                       | 564 (7.0%)       | 128 (4.8%)       | 181 (7.8%)        | 255 (8.2%)       | <.0001 | 0.65   | <.0001 |
| Place in Therapy                          |                  |                  |                   |                  |        |        |        |
| First-line                                | 6722 (82.8%)     | 2663             | 2325              | 1734 (55.5%)     | <.0001 | <.0001 | <.0001 |
| Second-line                               | 5490 (67.7%)     | 1524 (57.2%)     | 1470 (63.2%)      | 2496 (79.8%)     | <.0001 | <.0001 | <.0001 |
| Number of Antihypertensive Classes        |                  |                  |                   |                  |        |        |        |
| 1                                         | 2317 (28.6%)     | 556 (20.9%)      | 321 (13.8%)       | 1440 (46.1%)     | <.0001 | <.0001 | <.0001 |
| 2                                         | 2676 (33.0%)     | 939 (35.3%)      | 693 (29.8%)       | 1044 (33.4%)     | 0.14   | 0.0054 | <.0001 |
| 3+                                        | 3121 (38.5%)     | 1168 (43.9%)     | 1311 (56.4%)      | 642 (20.5%)      | <.0001 | <.0001 | <.0001 |
| Number, median (IQR)                      | 2.0 (1.0 - 3.0)  | 2.0 (2.0 - 3.0)  | 3.0 (2.0 - 4.0)   | 2.0 (1.0 - 2.0)  | <.0001 | <.0001 | <.0001 |
| Other Drug Therapies                      |                  |                  |                   |                  |        |        |        |
| Statins                                   | 4876 (60.1%)     | 1710 (64.2%)     | 1487 (64.0%)      | 1679 (53.7%)     | <.0001 | <.0001 | 0.87   |
| Other lipid lowering agents               | 480 (5.9%)       | 149 (5.6%)       | 167 (7.2%)        | 164 (5.2%)       | 0.60   | 0.0037 | 0.025  |
| Oral anticoagulants                       | 1277 (15.7%)     | 348 (13.1%)      | 317 (13.6%)       | 612 (19.6%)      | <.0001 | <.0001 | 0.59   |
| Insulin                                   | 1566 (19.3%)     | 550 (20.7%)      | 497 (21.4%)       | 519 (16.6%)      | <.0001 | <.0001 | 0.55   |
| Oral antihyperglycemic agents             | 2521 (31.1%)     | 1021 (38.3%)     | 845 (36.3%)       | 655 (21.0%)      | <.0001 | <.0001 | 0.15   |
| Follow-up                                 |                  |                  |                   |                  |        |        |        |
| Follow-up days, median (IQR)              | 7.0 (4.0 - 13.0) | 7.0 (4.0 - 12.0) | 7.0 (4.0 - 12.0)  | 7.0 (4.0 - 13.0) | 0.22   | 0.0078 | 0.15   |
| Days to death, median (IQR)               | 8.0 (4.0 - 15.0) | 8.0 (4.5 - 16.0) | 10.0 (5.0 - 17.0) | 6.0 (4.0 - 14.0) | 0.0052 | <.0001 | 0.18   |
| Total mortality                           | 765 (9.4%)       | 247 (9.3%)       | 222 (9.5%)        | 296 (9.5%)       | 0.84   | 0.96   | 0.78   |

# Race is unknown in all commercially insured enrollees.

\*\* Cells with values < 11 were suppressed in accordance with the Centers for Medicare and Medicare Services cell size suppression policy for values from 1 to 10.

**Table S6. Odds ratios for falsification endpoints by exposure and insurance type in primary outpatient cohort.**

| Falsification Endpoint              | Overall                                |                         | Medicare               |                        | Commercial             |                         |                        |
|-------------------------------------|----------------------------------------|-------------------------|------------------------|------------------------|------------------------|-------------------------|------------------------|
|                                     | N                                      | OR (95% CI)             | N                      | OR (95% CI)            | N                      | OR (95% CI)             |                        |
| Absent kidney                       | *                                      | NA                      | *                      | NA                     | *                      | NA                      |                        |
| Acid reflux                         | 59 vs 80                               | 0.70 (0.48–1.00); 0.053 | 46 vs 42               | 1.11 (0.71–1.75); 0.64 | 11 vs 23               | 0.43 (0.20–0.92); 0.030 |                        |
| Anal and rectal polyps              | *                                      | NA                      | *                      | NA                     | *                      | NA                      |                        |
| Herpes zoster without complications | *                                      | NA                      | *                      | NA                     | *                      | NA                      |                        |
| Ingrowing nail                      | 10 vs 12                               | 0.83 (0.35–1.94); 0.67  | 7 vs 12                | 0.57 (0.22–1.48); 0.25 | *                      | NA                      |                        |
| ACE inhibitor vs Other              | Late effects of motor vehicle accident | *                       | NA                     | *                      | NA                     | *                       | NA                     |
|                                     | Nicotine dependence                    | 7 vs 9                  | 0.77 (0.29–2.10); 0.61 | 7 vs 6                 | 1.17 (0.39–3.53); 0.78 | 3 vs 7                  | 0.41 (0.10–1.64); 0.21 |
| Pain in wrist                       | 11 vs 7                                | 1.59 (0.61–4.13); 0.34  | 8 vs 6                 | 1.34 (0.46–3.92); 0.59 | *                      | NA                      |                        |
| Presbyopia                          | 22 vs 22                               | 1.00 (0.55–1.83); 1.00  | 18 vs 19               | 0.94 (0.49–1.84); 0.87 | 5 vs 1                 | 5.16 (0.59–44.81); 0.14 |                        |
| Strain of rotator cuff capsule      | *                                      | NA                      | *                      | NA                     | *                      | NA                      |                        |
| Wrist drop                          | *                                      | NA                      | *                      | NA                     | *                      | NA                      |                        |
| Absent kidney                       | *                                      | NA                      | *                      | NA                     | *                      | NA                      |                        |
| ARB vs Other                        | Acid reflux                            | 55 vs 70                | 0.75 (0.51–1.10); 0.15 | 43 vs 42               | 1.03 (0.65–1.63); 0.91 | 17 vs 23                | 0.70 (0.35–1.38); 0.30 |
|                                     | Anal and rectal polyps                 | *                       | NA                     | *                      | NA                     | *                       | NA                     |
|                                     | Herpes zoster without complications    | *                       | NA                     | *                      | NA                     | *                       | NA                     |

|                      |                                        |          |                        |          |                        |          |                          |
|----------------------|----------------------------------------|----------|------------------------|----------|------------------------|----------|--------------------------|
|                      | Ingrowing nail                         | 7 vs 12  | 0.58 (0.22–1.48); 0.25 | 10 vs 8  | 1.26 (0.49–3.24); 0.63 | *        | NA                       |
|                      | Late effects of motor vehicle accident | *        | NA                     | *        | NA                     | *        | NA                       |
|                      | Nicotine dependence                    | 7 vs 14  | 0.49 (0.20–1.23); 0.13 | 5 vs 7   | 0.71 (0.22–2.26); 0.56 | 3 vs 7   | 0.41 (0.10–1.64); 0.21   |
|                      | Pain in wrist                          | 7 vs 9   | 0.77 (0.29–2.10); 0.61 | 5 vs 4   | 1.25 (0.33–4.72); 0.74 | *        | NA                       |
|                      | Presbyopia                             | 15 vs 22 | 0.67 (0.34–1.31); 0.24 | 14 vs 16 | 0.87 (0.42–1.81); 0.71 | *        | NA                       |
|                      | Strain of rotator cuff capsule         | *        | NA                     | *        | NA                     | *        | NA                       |
|                      | Wrist drop                             | *        | NA                     | *        | NA                     | *        | NA                       |
|                      | Absent kidney                          | *        | NA                     | *        | NA                     | *        | NA                       |
|                      | Acid reflux                            | 70 vs 86 | 0.79 (0.56–1.11); 0.17 | 54 vs 58 | 0.92 (0.61–1.38); 0.68 | 15 vs 28 | 0.50 (0.26–0.97); 0.040  |
|                      | Anal and rectal polyps                 | *        | NA                     | *        | NA                     | *        | NA                       |
|                      | Herpes zoster without complications    | *        | 0.50 (0.09–2.73); 0.42 | *        | NA                     | *        | NA                       |
|                      | Ingrowing nail                         | 11 vs 9  | 1.23 (0.50–2.98); 0.65 | 10 vs 11 | 0.91 (0.38–2.16); 0.82 | *        | NA                       |
| ACE inhibitor vs ARB | Late effects of motor vehicle accident | *        | NA                     | *        | NA                     | *        | NA                       |
|                      | Nicotine dependence                    | 13 vs 7  | 1.88 (0.74–4.74); 0.18 | 8 vs 5   | 1.61 (0.52–4.98); 0.41 | 5 vs 2   | 2.54 (0.49–13.21); 0.27  |
|                      | Pain in wrist                          | 11 vs 11 | 1.00 (0.43–2.32); 1.00 | 6 vs 8   | 0.75 (0.26–2.17); 0.59 | *        | NA                       |
|                      | Presbyopia                             | 32 vs 21 | 1.55 (0.89–2.73); 0.12 | 22 vs 21 | 1.05 (0.57–1.95); 0.87 | 7 vs 1   | 7.20 (0.88–59.01); 0.066 |
|                      | Strain of rotator cuff capsule         | *        | NA                     | *        | NA                     | *        | NA                       |



Wrist drop

\*

NA

\*

NA

\*

NA

NA = Not Applicable. Odds Ratios were not calculated when  $\leq 5$  patients in each group had a claim relating to the falsification endpoint.

**Table S7. Secondary outcome of in-hospital mortality in the primary outpatient cohort of SARS-CoV-2 positive patients.**

|                           | Number of patients in matched groups |               | In-hospital death events in matched groups |               | In-hospital mortality                   |
|---------------------------|--------------------------------------|---------------|--------------------------------------------|---------------|-----------------------------------------|
| Comparison Group          | Treatment Group                      | Control Group | Treatment Group                            | Control Group | Adjusted Hazard Ratio (95% CI; P-value) |
| <b>Overall population</b> |                                      |               |                                            |               |                                         |
| ACE inhibitor vs Other    | 441                                  | 441           | 7                                          | 9             | 0.71 (0.25, 2.03); 0.52                 |
| ARB vs Other              | 412                                  | 412           | 4                                          | 8             | 0.48 (0.14, 1.66); 0.24                 |
| ACE inhibitor vs ARB      | 591                                  | 591           | 7                                          | 7             | 1.12 (0.36, 3.47); 0.84                 |
| <b>Medicare Advantage</b> |                                      |               |                                            |               |                                         |
| ACE inhibitor vs Other    | 296                                  | 296           | 6                                          | 8             | 0.68 (0.23, 2.03); 0.49                 |
| ARB vs Other              | 283                                  | 283           | 6                                          | 7             | 0.78 (0.25, 2.41); 0.67                 |
| ACE inhibitor vs ARB      | 352                                  | 352           | 4                                          | 7             | 0.50 (0.13, 1.87); 0.30                 |

ACE: angiotensin converting enzyme  
 ARB: Angiotensin II receptor blocker  
 CI: confidence interval

**Table S8. Association of ACE inhibitor and ARB therapy on in-hospital mortality or discharge to hospice care in the primary COVID-19 inpatient cohort.**

|                           | <b>In-hospital Mortality</b>          | <b>Survival to Discharge</b>          |
|---------------------------|---------------------------------------|---------------------------------------|
| <b>Comparison Group</b>   | <b>Hazard Ratio (95% CI, P-value)</b> | <b>Hazard Ratio (95% CI, P-value)</b> |
| <b>Overall population</b> |                                       |                                       |
| ACE inhibitor vs Other    | 0.90 (0.76, 1.07); 0.23               | 1.03 (0.95, 1.13); 0.48               |
| ARB vs Other              | 1.08 (0.91, 1.28); 0.41               | 1.04 (0.96, 1.14); 0.40               |
| ACE inhibitor vs ARB      | 0.85 (0.73, 1.00); 0.043              | 1.04 (0.96, 1.13); 0.32               |
| <b>Medicare Advantage</b> |                                       |                                       |
| ACE vs Other              | 0.90 (0.76, 1.07); 0.22               | 1.08 (0.99, 1.19); 0.083              |
| ARB vs Other              | 1.09 (0.92, 1.30); 0.31               | 1.03 (0.93, 1.13); 0.60               |
| ACE vs ARB                | 0.86 (0.73, 1.01); 0.073              | 1.05 (0.96, 1.15); 0.25               |

ACE: angiotensin converting enzyme

ARB: Angiotensin II receptor blocker

CI: confidence interval

COVID-19: Coronavirus disease 2019

**Table S9. Length of stay (median days, IQR) for primary COVID-19 inpatient cohort after propensity score matching.**

| Comparison Group          | Died or Survived |                |                | Died           |                |                | Survived       |                |                |
|---------------------------|------------------|----------------|----------------|----------------|----------------|----------------|----------------|----------------|----------------|
|                           | Both             | Treatment      | Control        | Both           | Treatment      | Control        | Both           | Treatment      | Control        |
| <b>Overall Population</b> |                  |                |                |                |                |                |                |                |                |
| ACE vs Other              | 6.0 (3.0–11.0)   | 6.0 (3.0–10.0) | 7.0 (3.0–11.0) | 6.0 (3.0–10.0) | 7.0 (3.0–10.0) | 5.0 (2.0–9.0)  | 6.0 (3.0–9.0)  | 6.0 (3.0–9.0)  | 6.0 (3.0–10.0) |
| ARB vs Other              | 6.0 (3.0–11.0)   | 6.0 (3.0–11.0) | 6.0 (3.0–11.0) | 6.0 (3.0–11.0) | 7.0 (3.0–12.0) | 4.0 (2.0–9.0)  | 6.0 (3.0–10.0) | 6.0 (3.0–10.0) | 6.0 (3.0–10.0) |
| ACE vs ARB                | 6.0 (3.0–11.0)   | 6.0 (3.0–11.0) | 6.0 (3.0–11.0) | 6.0 (3.0–11.0) | 6.0 (3.0–10.8) | 7.0 (3.0–12.0) | 6.0 (3.0–10.0) | 6.0 (3.0–9.0)  | 6.0 (3.0–10.0) |
| <b>Medicare Advantage</b> |                  |                |                |                |                |                |                |                |                |
| ACE vs Other              | 7.0 (3.0–11.0)   | 7.0 (3.0–11.0) | 6.5 (3.0–11.0) | 6.0 (3.0–10.0) | 7.0 (3.0–10.0) | 5.0 (3.0–10.0) | 6.0 (3.0–10.0) | 6.0 (3.0–9.0)  | 6.0 (3.0–10.0) |
| ARB vs Other              | 7.0 (3.0–12.0)   | 6.0 (3.0–12.0) | 7.0 (3.0–12.0) | 6.0 (3.0–11.0) | 7.0 (3.0–13.0) | 5.0 (3.0–11.0) | 6.0 (3.0–10.0) | 6.0 (3.0–10.0) | 6.0 (3.0–10.0) |
| ACE vs ARB                | 6.0 (3.0–11.0)   | 6.0 (3.0–11.0) | 6.0 (3.0–11.0) | 7.0 (3.0–12.0) | 6.0 (3.0–11.0) | 7.0 (3.0–12.0) | 6.0 (3.0–10.0) | 6.0 (3.0–10.0) | 6.0 (3.0–10.0) |

ACE: angiotensin converting enzyme  
 ARB: Angiotensin II receptor blocker  
 COVID-19: Coronavirus disease 2019  
 IQR: Interquartile range

**Table S10. Odds ratios for falsification endpoints by exposure and insurance type, primary inpatient cohort.**

|                                        | Falsification Endpoint                 | Overall Population |                             | Medicare                  |                            |                           |
|----------------------------------------|----------------------------------------|--------------------|-----------------------------|---------------------------|----------------------------|---------------------------|
|                                        |                                        | N                  | OR (95% CI)                 | N                         | OR (95% CI)                |                           |
| ACE inhibitor vs Other                 | Absent kidney                          | 4 vs 4             | 0.33 (0.078, 1.10); P=0.076 | *                         | NA                         |                           |
|                                        | Acid reflux                            | 340 vs 387         | 0.97 (0.81, 1.18); P=0.82   | 338 vs 357                | 1.08 (0.89, 1.32); P=0.44  |                           |
|                                        | Anal/rectal polyps                     | *                  | NA                          | *                         | NA                         |                           |
|                                        | Herpes zoster without complications    | 27 vs 27           | 0.78 (0.32, 1.87); P=0.69   | 28 vs 28                  | 0.71 (0.28, 1.73); P=0.54  |                           |
|                                        | Ingrowing nail                         | 95 vs 102          | 1.12 (0.81, 1.56); P=0.52   | 98 vs 106                 | 1.12 (0.79, 1.58); P=0.56  |                           |
|                                        | Late effects of motor vehicle accident | 7 vs 9             | 0.75 (0.11, 4.44); P=1.00   | 7 vs 8                    | 2.00 (0.28, 22.16); P=0.69 |                           |
|                                        | Nicotine dependence                    | 65 vs 71           | 1.45 (1.01, 2.07); P=0.040  | 61 vs 65                  | 1.59 (1.08, 2.35); P=0.016 |                           |
|                                        | Pain in wrist                          | 49 vs 53           | 0.62 (0.38, 1.02); P=0.061  | 48 vs 51                  | 0.64 (0.38, 1.09); P=0.11  |                           |
|                                        | Presbyopia                             | 124 vs 122         | 0.94 (0.67, 1.30); P=0.75   | 121 vs 121                | 0.84 (0.60, 1.17); P=0.33  |                           |
|                                        | Strain of rotator cuff capsule         | *                  | NA                          | *                         | NA                         |                           |
|                                        | Wrist drop                             | *                  | NA                          | *                         | NA                         |                           |
|                                        | ARB vs Other                           | Absent kidney      | 5 vs 6                      | 1.18 (0.49, 2.93); P=0.84 | 3 vs 5                     | 1.00 (0.39, 2.55); P=1.00 |
|                                        |                                        | Acid reflux        | 342 vs 335                  | 1.13 (0.93, 1.37); P=0.21 | 311 vs 292                 | 1.12 (0.92, 1.37); P=0.28 |
| Anal/rectal polyps                     |                                        | *                  | NA                          | *                         | NA                         |                           |
| Herpes zoster without complications    |                                        | 17 vs 15           | 0.66 (0.29, 1.46); P=0.36   | 19 vs 16                  | 0.91 (0.34, 2.36); P=1.00  |                           |
| Ingrowing nail                         |                                        | 74 vs 90           | 1.2 (0.83, 1.70); P=0.39    | 69 vs 81                  | 1.21 (0.85, 1.73); P=0.30  |                           |
| Late effects of motor vehicle accident |                                        | 9 vs 8             | 0.83 (0.20, 3.28); P=1.00   | 1 vs 4                    | 1.00 (0.19, 5.38); P=1.00  |                           |
| Nicotine dependence                    |                                        | 43 vs 43           | 1.03 (0.71, 1.52); P=0.93   | 39 vs 35                  | 1.12 (0.75, 1.71); P=0.62  |                           |
| Pain in wrist                          |                                        | 47 vs 52           | 0.89 (0.54, 1.46); P=0.72   | 45 vs 43                  | 0.76 (0.46, 1.24); P=0.29  |                           |
| Presbyopia                             |                                        | 115 vs 111         | 0.77 (0.54, 1.10); P=0.16   | 109 vs 111                | 0.89 (0.62, 1.29); P=0.59  |                           |
| Strain of rotator cuff capsule         |                                        | 5 vs 3             | NA                          | *                         | NA                         |                           |

|                      |                                        |            |                            |            |                            |
|----------------------|----------------------------------------|------------|----------------------------|------------|----------------------------|
|                      | Wrist drop                             | *          | NA                         | *          | NA                         |
|                      | Absent kidney                          | 6 vs 6     | 0.37 (0.12, 1.01); P=0.052 | 3 vs 7     | 0.36 (0.10, 1.00); P=0.062 |
|                      | Acid reflux                            | 352 vs 403 | 0.87 (0.731, 1.05); P=0.15 | 334 vs 370 | 0.90 (0.75, 1.10); P=0.31  |
|                      | Anal/rectal polyps                     | *          | NA                         | *          | NA                         |
|                      | Herpes zoster without complications    | 20 vs 20   | 0.94 (0.46, 1.95); P=1     | 15 vs 15   | 1.00 (0.43, 2.30); P=1.00  |
|                      | Ingrowing nail                         | 89 vs 77   | 0.91 (0.66, 1.25); P=0.58  | 91 vs 79   | 0.84 (0.61, 1.16); P=0.30  |
| ACE inhibitor vs ARB | Late effects of motor vehicle accident | 10 vs 8    | 0.71 (0.18, 2.62); P=0.77  | 9 vs 7     | 1.25 (0.27, 6.31); P=1.00  |
|                      | Nicotine dependence                    | 53 vs 53   | 1.3 (0.91, 1.75); P=0.17   | 43 vs 46   | 1.33 (0.93, 1.90); P=0.12  |
|                      | Pain in wrist                          | 47 vs 51   | 0.75 (0.46, 1.20); P=0.25  | 48 vs 52   | 0.70 (0.41, 1.16); P=0.18  |
|                      | Presbyopia                             | 144 vs 138 | 0.87 (0.62, 1.22); P=0.45  | 133 vs 126 | 0.89 (0.63, 1.26); P=0.56  |
|                      | Strain of rotator cuff capsule         | *          | 0.80 (0.16, 3.72); P=1.00  | *          | NA                         |
|                      | Wrist drop                             | *          | NA                         | *          | NA                         |

NA = Not Applicable; Odds Ratios not calculated when  $\leq 5$  patients in each group had a claim relating to the falsification endpoint.

**Table S11. Hazard ratio for hospitalization among individuals testing positive for SARS-CoV-2 in the primary outpatient cohort, where control arm uses first-line antihypertensive drugs only.**

| Comparison Group          | Treatment | Control | Matched | Hospitalization Hazard Ratio (95% CI, P-value) | Equipoise Metric |
|---------------------------|-----------|---------|---------|------------------------------------------------|------------------|
| <b>Overall population</b> |           |         |         |                                                |                  |
| ACE inhibitor vs Other    | 722       | 511     | 364     | 0.75 (0.48, 1.17); 0.20                        | 0.66             |
| ARB vs Other              | 731       | 511     | 366     | 0.80 (0.54, 1.17); 0.25                        | 0.60             |
| ACE inhibitor vs ARB      | 722       | 731     | 589     | 0.88 (0.63, 1.23); 0.46                        | 0.94             |
| <b>Medicare Advantage</b> |           |         |         |                                                |                  |
| ACE vs Other              | 434       | 352     | 249     | 0.56 (0.35, 0.90); 0.016                       | 0.66             |
| ARB vs Other              | 452       | 352     | 245     | 0.81 (0.53, 1.24); 0.34                        | 0.62             |
| ACE vs ARB                | 434       | 452     | 350     | 0.91 (0.60, 1.39); 0.67                        | 0.92             |

ACE: angiotensin converting enzyme

ARB: Angiotensin II receptor blocker

CI: Confidence interval

**Table S12. Hazard ratio for mortality in primary cohort of hospitalized COVID-19 patients, where control arm uses first-line antihypertensive drugs only.**

| Comparison Group          | Treatment | Control | Matched | Mortality Hazard Ratio (95% CI, P-value) | Survival Hazard Ratio (95% CI, P-value) | Equipoise Metric |
|---------------------------|-----------|---------|---------|------------------------------------------|-----------------------------------------|------------------|
| <b>Overall population</b> |           |         |         |                                          |                                         |                  |
| ACE inhibitor vs Other    | 2360      | 1807    | 1465    | 0.96 (0.79, 1.17); 0.70                  | 1.00 (0.91, 1.10); 0.95                 | 0.76             |
| ARB vs Other              | 2224      | 1807    | 1360    | 1.01 (0.83, 1.23); 0.91                  | 0.98 (0.89, 1.08); 0.66                 | 0.67             |
| ACE inhibitor vs ARB      | 2360      | 2224    | 1878    | 0.89 (0.75, 1.05); 0.16                  | 1.03 (0.95, 1.12); 0.52                 | 0.95             |
| <b>Medicare Advantage</b> |           |         |         |                                          |                                         |                  |
| ACE vs Other              | 2151      | 1674    | 1352    | 0.86 (0.70, 1.05); 0.13                  | 1.02 (0.92, 1.12); 0.75                 | 0.77             |
| ARB vs Other              | 1989      | 1674    | 1248    | 1.08 (0.89, 1.31); 0.44                  | 0.95 (0.86, 1.06); 0.40                 | 0.68             |
| ACE vs ARB                | 2151      | 1989    | 1707    | 0.83 (0.70, 0.99); 0.036                 | 1.03 (0.94, 1.12); 0.55                 | 0.95             |

ACE: angiotensin converting enzyme  
 ARB: Angiotensin II receptor blocker  
 CI: Confidence interval  
 COVID-19: Coronavirus disease 2019



**Table S13. Unadjusted hazard ratio for hospitalization in primary cohort of outpatient SARS-CoV-2 positive patients.**

| <b>Comparison Group</b>   | <b>Matched Size</b> | <b>Hospitalization Hazard Ratio (95% CI, P-value)</b> | <b>Equipoise Metric</b> |
|---------------------------|---------------------|-------------------------------------------------------|-------------------------|
| <b>Overall population</b> |                     |                                                       |                         |
| ACE inhibitor vs other    | 441                 | 0.78 (0.54, 1.14); 0.20                               | 0.54                    |
| ARB vs other              | 412                 | 0.86 (0.60, 1.22); 0.39                               | 0.46                    |
| ACE inhibitor vs ARB      | 591                 | 0.90 (0.64, 1.27); 0.55                               | 0.94                    |
| <b>Medicare Advantage</b> |                     |                                                       |                         |
| ACE inhibitor vs other    | 296                 | 0.64 (0.42, 0.97); 0.037                              | 0.55                    |
| ARB vs other              | 283                 | 0.88 (0.58, 1.33); 0.54                               | 0.49                    |
| ACE inhibitor vs ARB      | 352                 | 0.86 (0.56, 1.33); 0.50                               | 0.92                    |

ACE: angiotensin converting enzyme

ARB: Angiotensin II receptor blocker

CI: Confidence interval

**Table S14. Unadjusted hazard ratio for mortality in primary cohort of hospitalized COVID-19 patients.**

| Comparison Group          | Treatment | Control | Matched | Mortality Hazard Ratio (95% CI, P-value) | Survival to Discharge Hazard Ratio (95% CI, P-value) | Equipose Metric |
|---------------------------|-----------|---------|---------|------------------------------------------|------------------------------------------------------|-----------------|
| <b>Overall population</b> |           |         |         |                                          |                                                      |                 |
| ACE inhibitor vs Other    | 2360      | 3338    | 1731    | 0.98 (0.82, 1.18); 0.85                  | 1.02 (0.94, 1.11); 0.62                              | 0.56            |
| ARB vs Other              | 2224      | 3338    | 1560    | 1.13 (0.94, 1.36); 0.20                  | 1 (0.91, 1.09); 0.98                                 | 0.46            |
| ACE inhibitor vs ARB      | 2360      | 2224    | 1882    | 0.90 (0.76, 1.07); 0.23                  | 1.04 (0.95, 1.13); 0.39                              | 0.95            |
| <b>Medicare Advantage</b> |           |         |         |                                          |                                                      |                 |
| ACE vs Other              | 2151      | 3145    | 1580    | 0.91 (0.75, 1.09); 0.29                  | 1.03 (0.94, 1.13); 0.49                              | 0.56            |
| ARB vs Other              | 1989      | 3145    | 1425    | 1.20 (0.99, 1.45); 0.060                 | 1.00 (0.91, 1.10); 0.97                              | 0.46            |
| ACE vs ARB                | 2151      | 1989    | 1704    | 0.89 (0.75, 1.06); 0.19                  | 1.01 (0.93, 1.11); 0.77                              | 0.95            |

ACE: Angiotensin converting enzyme

ARB: Angiotensin II receptor blocker

CI: Confidence interval

COVID-19: Coronavirus disease 2019

**Table S15. Studies evaluating the association of the use of ACE inhibitor and ARBs with COVID-19 severity and mortality.**

| Author (Year)                 | Country | Centers       | Study Population            | N                | Outcomes                                   | Cofounder Adjustment | Odds/Hazard Ratios (95% Confidence interval) or Observed %                                                                                                                                                                                                                                                                                                                                                                                                                                                                                                                                                                                                                                                      |
|-------------------------------|---------|---------------|-----------------------------|------------------|--------------------------------------------|----------------------|-----------------------------------------------------------------------------------------------------------------------------------------------------------------------------------------------------------------------------------------------------------------------------------------------------------------------------------------------------------------------------------------------------------------------------------------------------------------------------------------------------------------------------------------------------------------------------------------------------------------------------------------------------------------------------------------------------------------|
| de Abajo (2020) <sup>12</sup> | Spain   | Multicenter   | All-comers                  | 1,139            | Hospitalization                            | (+)                  | <p>No association with COVID-19 hospitalization among any RAAS user, ACE inhibitor user, or ARB user.</p> <p><b>Hospitalization</b></p> <p>All RAAS: 0.94 (0.77–1.15)</p> <p>ACE: 0.80 (0.64–1.00)</p> <p>ARB: 1.10 (0.88–1.37)</p>                                                                                                                                                                                                                                                                                                                                                                                                                                                                             |
| Reynolds (2020) <sup>13</sup> | USA     | Single center | All-comers;<br>Hypertension | 12,592;<br>1,002 | SARS-CoV-2 infection;<br>COVID-19 severity | (+)                  | <p>No association with likelihood of positive PCR test in the ACE/ARB, ACE inhibitor, or ARB groups among all matched patients (+/- Hypertension). Similar findings for the Hypertension cohort.</p> <p><b>SARS-CoV-2 infection</b></p> <p>ACE/ARB: 0.5% (-2.6% to 3.6%)</p> <p>ACE: -2.5% (-6.7% to 1.6%)</p> <p>ARB: 2.2% (-1.9% to 6.3%)</p> <p>No association with ACE/ARB, ACE or ARB use and percentage of people with severe COVID-19 illness (ICU, ventilation, death) among All-comers (+/- Hypertension). Similar findings for the Hypertension cohort.</p> <p><b>COVID-19 severity</b></p> <p>ACE/ARB: -0.1% (-3.7% to 3.5%)</p> <p>ACE: -1.9% (-6.6% to 2.8%)</p> <p>ARB: -1.4% (-6.1% to 3.3%)</p> |

|                                |                   |             |                             |                |                                  |     |                                                                                                                                                                                                                                                                                                                                                                                                                                                                                        |
|--------------------------------|-------------------|-------------|-----------------------------|----------------|----------------------------------|-----|----------------------------------------------------------------------------------------------------------------------------------------------------------------------------------------------------------------------------------------------------------------------------------------------------------------------------------------------------------------------------------------------------------------------------------------------------------------------------------------|
| Zhang<br>(2020) <sup>24</sup>  | China             | Multicenter | Hypertension                | 1,128          | Mortality                        | (+) | Lower risk of all-cause mortality was associated with in-hospital ACE/ARB use in hospitalized COVID-19 patients with Hypertension compared to those not receiving in-hospital ACE inhibitor or ARB.<br><br><b>mortality</b><br><br>ACE/ARB: 0.37 [95% CI, 0.15–0.89]; <i>P</i> =0.03)                                                                                                                                                                                                  |
| Mehta<br>(2020) <sup>25</sup>  | USA               | Multicenter | All-comers                  | 18,472         | SARS-CoV-2 infection             | (+) | No association was found with ACE/ARB use and the likelihood of a positive SARS-CoV-2 test.<br><br><b>SARS-CoV-2 infection</b><br><br>ACE/ARB: 0.97 (0.81-1.15)                                                                                                                                                                                                                                                                                                                        |
| Fosbøl<br>(2020) <sup>36</sup> | Denmark           | Multicenter | All-comers;<br>Hypertension | 4,480 ;<br>571 | Mortality; COVID-19<br>diagnosis | (+) | No association was observed with prior ACE/ARB use and COVID-19 mortality among All-comers (+/- Hypertension) compared to non-users.<br><br><b>Mortality</b><br><br>ACE/ARB: 0.83 (0.67-1.03); 0.09<br><br>No association was observed with ACE/ARB use and COVID-19 diagnosis compared with users of other antihypertensives.<br><br><b>COVID-19 diagnosis</b><br><br>ACE/ARB: 1.05 (0.80-1.36); 0.67<br><br>ACE: 0.85 (0.70-1.01); 0.08<br><br>ARB: 1.15 (0.96-1.37); <i>P</i> =0.11 |
| Bean<br>(2020) <sup>37</sup>   | United<br>Kingdom | Multicenter | All-comers                  | 1,200          | Mortality/ICU admission          | (+) | Prior ACE/ARB was associated with reduced mortality or ICU admission compared to non-users.<br><br><b>Mortality/ICU</b><br><br>ACE/ARB: 0.63 (0.47 – 0.84); <i>P</i> < 0.01<br>0.63 (95% confidence interval 0.47–0.84, <i>P</i> < 0.01                                                                                                                                                                                                                                                |

|                                 |                |                  |              |         |                                                                                                                                                    |     |                                                                                                                                                                                                                                                                                                                                                                                                                                                                                                                                                                                                                                                                                                          |
|---------------------------------|----------------|------------------|--------------|---------|----------------------------------------------------------------------------------------------------------------------------------------------------|-----|----------------------------------------------------------------------------------------------------------------------------------------------------------------------------------------------------------------------------------------------------------------------------------------------------------------------------------------------------------------------------------------------------------------------------------------------------------------------------------------------------------------------------------------------------------------------------------------------------------------------------------------------------------------------------------------------------------|
| Morales<br>(2020) <sup>10</sup> | Spain &<br>USA | Multicenter      | Hypertension | 612,700 | COVID-19 diagnosis;<br>COVID-19 Hospitalization;<br>Hospitalization with<br>pneumonia; Hospitalization<br>with pneumonia, ARDS, AKI,<br>or sepsis. | (+) | <p>No significant difference in COVID-19 diagnosis was associated with meta-analytic HRs after propensity scoring stratification or matching for any set of mono- and combination therapy drug comparisons to other first-line antihypertensive drugs.</p> <p><b>COVID-19 diagnosis</b></p> <p>ACE/ARB as monotherapy: 0.98 (0.84 - 1.14); 0.76</p> <p>ACE/ARB with combination: 1.01 (0.90 - 1.15); 0.81</p> <p>ACE monotherapy: 0.91 (0.68 - 1.21); 0.51</p> <p>ARB monotherapy: 1.10 (0.89 - 1.35); 0.40</p> <p>No associations between COVID-19 hospitalization, pneumonia hospitalization, or pneumonia/ARDS/AKI/sepsis were observed for any of the meta-analytic HRs in the drug comparisons.</p> |
| Meng<br>(2020) <sup>31</sup>    | China          | Single<br>center | Hypertension | 42      | COVID-19 severity                                                                                                                                  | (-) | <p>A smaller proportion of those taking ACE/ARBs were categorized as having severe COVID-19 as compared to other antihypertensive drugs.</p> <p><b>COVID-19 severity</b></p> <p>ACE/ARB: 25.5% vs 48% of non-ACE/ARB group</p>                                                                                                                                                                                                                                                                                                                                                                                                                                                                           |
| Son<br>(2020) <sup>41</sup>     | South<br>Korea | Multicenter      | Hypertension | 16,281  | SARS-CoV-2 infection;<br>COVID-19 severity                                                                                                         | (+) | <p>No association between risk of SARS-CoV-2 infection or COVID-19 severity (ICU admission or mortality) and RAAS inhibitor use was observed compared to non-users.</p> <p><b>SARS-CoV-2 infection</b></p> <p>RAAS: 1.161 (0.958–1.407); P &gt; 0.05</p> <p><b>ICU admission</b></p> <p>RAAS 1.515 (0.402–5.701)</p> <p><b>Mortality</b></p> <p>RAAS: 1.363 (0.513–3.662)</p>                                                                                                                                                                                                                                                                                                                            |
| Xu<br>(2020) <sup>42</sup>      | China          | Single<br>center | Hypertension | 101     | Mortality;<br>ICU admission; ventilation                                                                                                           | (-) | <p>No association of prior or in-hospital ACE/ARB use observed with death, ICU admission, or mechanical ventilation when compared to those using other antihypertensives.</p> <p><b>Mortality</b></p>                                                                                                                                                                                                                                                                                                                                                                                                                                                                                                    |

|                                  |       |               |              |     |                                                                                             |     |                                                                                                                                                                                                                                                                                                                                                                                                                                                                                           |
|----------------------------------|-------|---------------|--------------|-----|---------------------------------------------------------------------------------------------|-----|-------------------------------------------------------------------------------------------------------------------------------------------------------------------------------------------------------------------------------------------------------------------------------------------------------------------------------------------------------------------------------------------------------------------------------------------------------------------------------------------|
|                                  |       |               |              |     |                                                                                             |     | ACE/ARB: 0.73 (0.29–1.82); P= 0.4994<br><b>ICU Admission</b><br>ACE/ARB: 0.65 (0.25–1.70); 0.3798<br><b>Mechanical ventilation</b><br>ACE/ARB: 0.87 (0.31–2.43); P= 0.79                                                                                                                                                                                                                                                                                                                  |
| López-Otero (2020) <sup>43</sup> | Spain | Single center | All-comers   | 965 | Mortality;<br>heart failure; Hospitalization;<br>ICU admission;<br>MACE                     | (+) | No association between prior use of ACE/ARB was found with mortality, heart failure, hospitalization, ICU admission, or MACE when compared to non-users.<br><b>Mortality</b><br>ACE/ARB: 0.62 (0.17-2.26); .486<br><b>Heart failure</b><br>ACE/ARB: 1.37 (0.39-4.77); .622<br><b>Hospitalization</b><br>ACE/ARB: 0.85 (0.45-1.64); .638<br><b>ICU admission</b><br>ACE/ARB: 0.87 (0.30-2.50); .798<br><b>Major adverse cardiovascular events (MACE)</b><br>AE/ARB: 1.06 (0.39-2.83); .915 |
| Amat-Santos (2020) <sup>44</sup> | Spain | Multicenter   | post-TAVR    | 102 | COVID-19 diagnosis                                                                          | RCT | No association between use of the ACE inhibitor ramipril and COVID-19 diagnosis (1.150 [0.351 - 3.768]; NR) compared to non-RAAS users.                                                                                                                                                                                                                                                                                                                                                   |
| Felice (2020) <sup>45</sup>      | Italy | Single center | Hypertension | 133 | COVID-19 Hospitalization;<br>oxygen;<br>non-invasive ventilation; ICU admission; Mortality; | (+) | ACE/ARB use was associated with a <i>reduced rate of admission to intensive care</i> compared to non-users.<br>(0.25 [0.09-0.66]; P= 0.006)<br><br>No association observed between ACE/ARB use or hospital admission, oxygen, non-invasive ventilation, or mortality.                                                                                                                                                                                                                     |

|                            |       |               |                          |                |                                            |           |                                                                                                                                                                                                                                                                                                                                                                                                                                                                                                               |
|----------------------------|-------|---------------|--------------------------|----------------|--------------------------------------------|-----------|---------------------------------------------------------------------------------------------------------------------------------------------------------------------------------------------------------------------------------------------------------------------------------------------------------------------------------------------------------------------------------------------------------------------------------------------------------------------------------------------------------------|
|                            |       |               |                          |                |                                            |           | <p><b>Hospital admission</b></p> <p>ACE/ARB: 0.39 (0.05-2.94); 0.365</p> <p><b>Oxygen use</b></p> <p>ACE/ARB: 0.51 (0.15-1.78); 0.292</p> <p><b>Non-invasive ventilation</b></p> <p>ACE/ARB: 0.58 (0.21-1.60); P= 0.296</p> <p><b>Mortality</b></p> <p>ACE/ARB: 0.56 (0.17-1.83); 0.341</p>                                                                                                                                                                                                                   |
| Yang (2020) <sup>46</sup>  | China | Single center | All-comers; Hypertension | 462            | COVID-19 severity; Mortality               | (-)       | <p>No association between the use of ACE/ARB and critical COVID-19 illness or mortality was observed.</p> <p><b>COVID-19 severity</b></p> <p>ACE/ARB: 9.3% versus 22.9%; P=0.061</p> <p><b>Mortality</b></p> <p>AC/ARB: 4.7% versus 13.3%; P=0.216</p>                                                                                                                                                                                                                                                        |
| Gao (2020) <sup>47</sup>   | China | Single center | All-comers; Hypertension | 2877;<br>710   | Mortality                                  | (+)       | <p>No difference in mortality was observed between RAAS users and non-users. A comparison of All-comers found that those with hypertension had an increased relative risk of mortality compared to those without.</p> <p><b>Mortality</b></p> <p>RAAS: 0.85 (0.28-2.58); 0.774</p>                                                                                                                                                                                                                            |
| Bravi (2020) <sup>48</sup> | Italy | Multicenter   | All-comers; Hypertension | 1,603 ;<br>543 | COVID-19 severity; Mortality/ICU admission | (-) ; (+) | <p>In unadjusted analysis, All-comers with very severe or fatal COVID-19 were more likely to be treated with ACE/ARBs than those with mild disease.</p> <p><b>COVID-19 mortality or ICU admission</b></p> <p>ACE/ARB: 54.2% vs 19.1%; P &lt; 0.001</p> <p>Among those with Hypertension and adjusting for comorbidities, no association was observed between ACE/ARB use and likelihood of developing very severe/lethal COVID-19 compared to non-users</p> <p><b>COVID-19 mortality or ICU admission</b></p> |

|                           |       |               |                          |       |                              |     |                                                                                                                                                                                                                                                                                                                                                                                                                                    |
|---------------------------|-------|---------------|--------------------------|-------|------------------------------|-----|------------------------------------------------------------------------------------------------------------------------------------------------------------------------------------------------------------------------------------------------------------------------------------------------------------------------------------------------------------------------------------------------------------------------------------|
|                           |       |               |                          |       |                              |     | ACE/ARB: 0.87 (0.50–1.49); 0.6                                                                                                                                                                                                                                                                                                                                                                                                     |
| Zhou (2020) <sup>49</sup> | China | Multicenter   | All-comers; Hypertension | 3,752 | Mortality                    | (+) | <p>Among All-comers, in-hospital use of ACE/ARB was associated with lower 28-day COVID-19 mortality risk compared to non-users, with similar findings for a Hypertension cohort.</p> <p><b>Mortality</b></p> <p>ACE/ARB: 0.39 (0.26–0.58); <math>P &lt; 0.001</math></p>                                                                                                                                                           |
| Li (2020) <sup>50</sup>   | China | Single center | Hypertension             | 362   | COVID-19 severity; Mortality | (-) | <p>Among those with hypertension hospitalized for COVID-19, there was no difference observed between rates of ACE/ARB use in those with severe vs non-severe disease, nor was there a difference in ACE/ARB use for COVID-19 survivors vs non-survivors.</p> <p><b>COVID-19 severity</b></p> <p>ACE/ARB: (32.9% vs 30.7%; <math>P = .65</math>)</p> <p><b>Mortality</b></p> <p>ACE/ARB: (27.3% vs 33.0%; <math>P = .34</math>)</p> |



Figure S1. Primary outpatient cohort selection flowsheet.

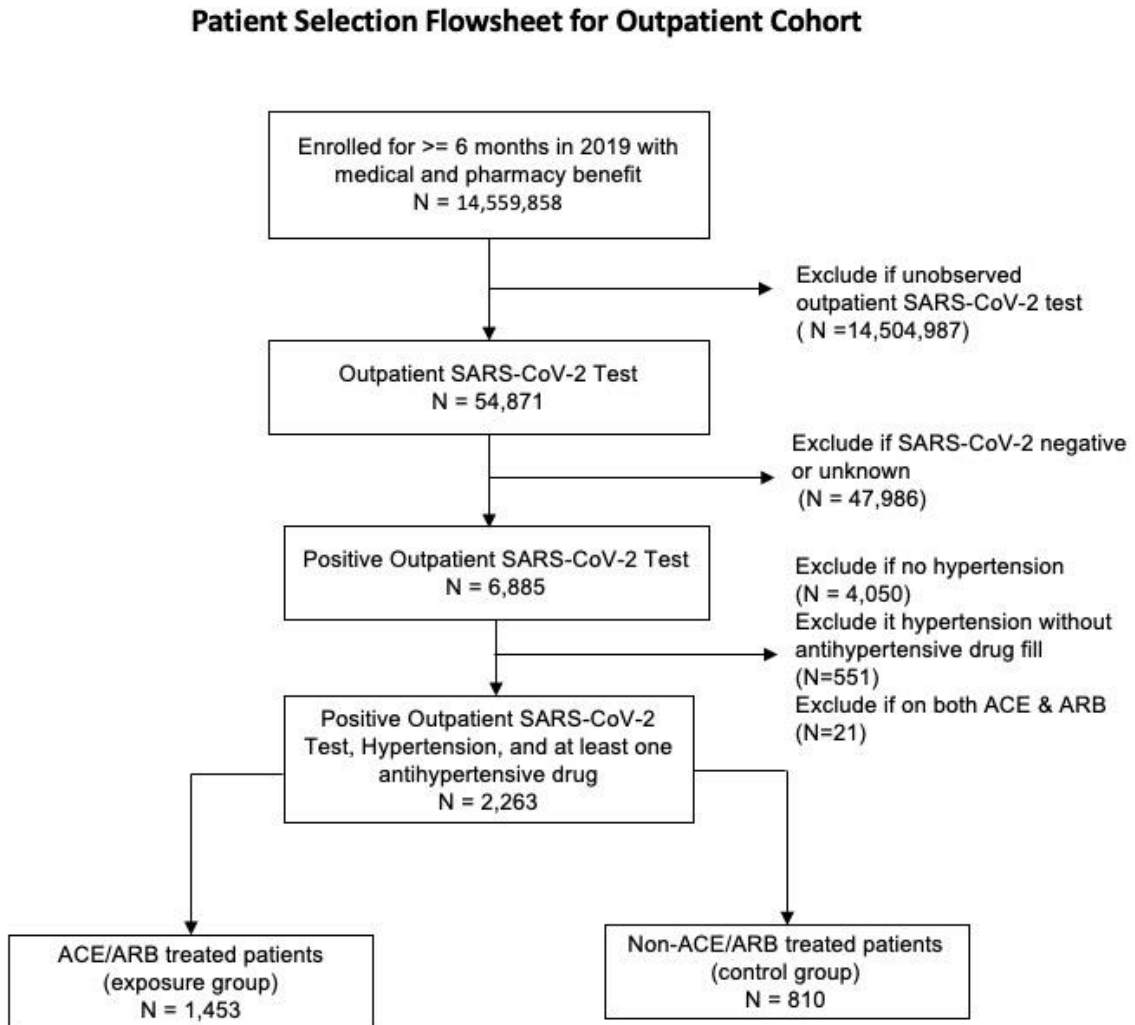

Figure S2. Primary inpatient cohort selection flowsheet.

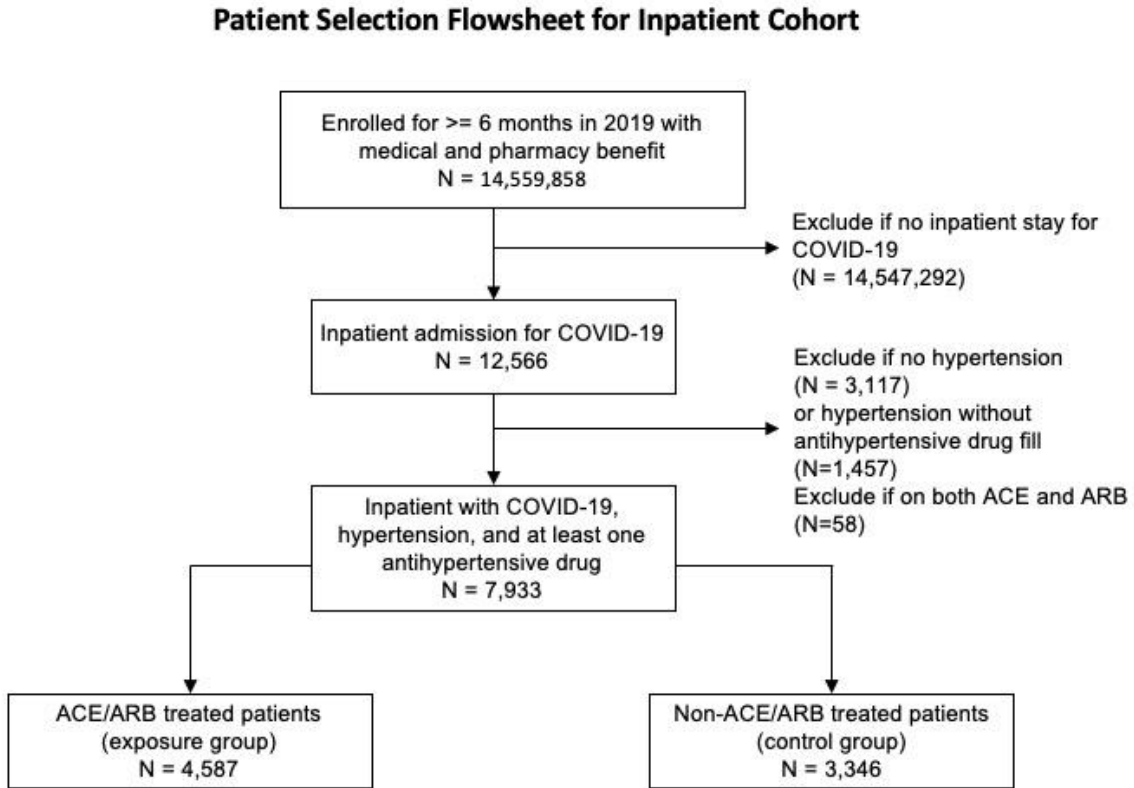

**Figure S3. Distribution of individuals in the primary outpatient and inpatient cohorts.**

**(A) SARS-CoV-2 test geographic distribution: number of tests by state. Patients in 44 states were included based on a positive test.**

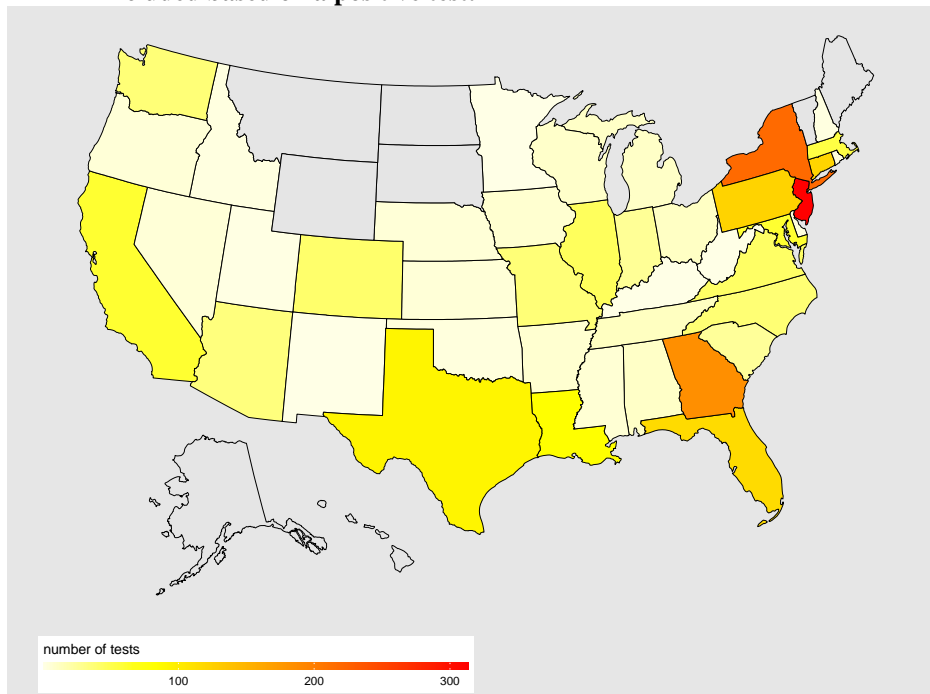

**(B) COVID-19 inpatient case distribution: number of inpatient cases by state. COVID-19 hospitalizations included in the study are represented in 47 states.**

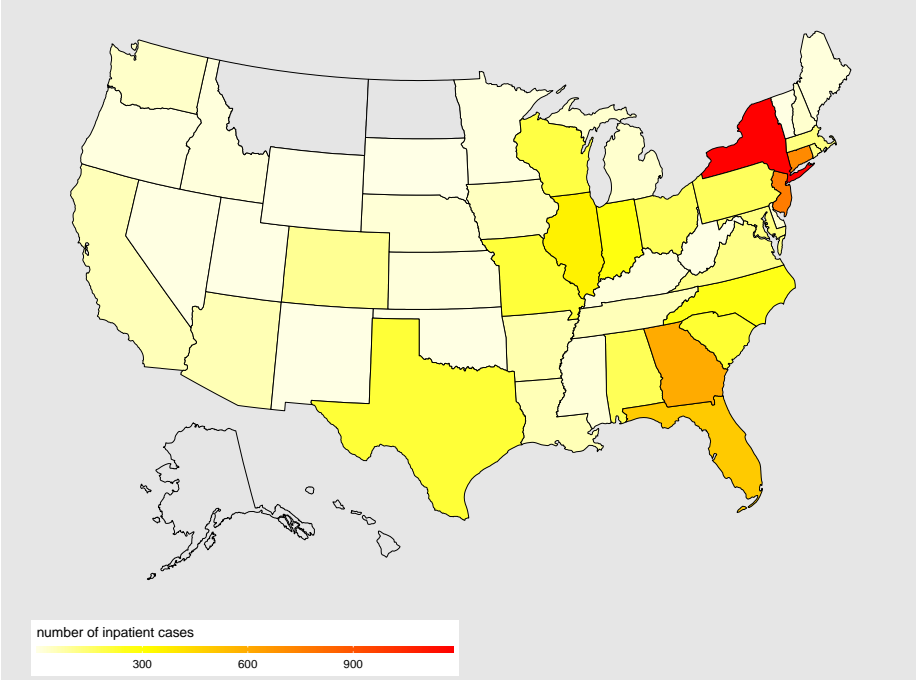

**Figure S4. Histogram of age distributions of primary outpatient and inpatient cohorts, stratified by insurance type.**

**(A) Histogram of age distribution of the outpatient cohort, Medicare Advantage versus Commercial**

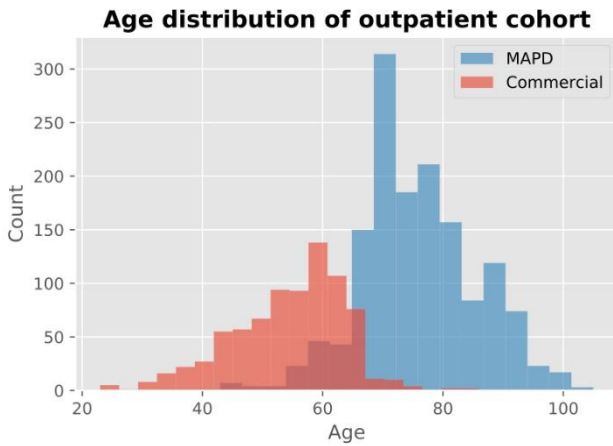

**(B) Histogram of age distribution of the outpatient cohort, Medicare Advantage versus Commercial**

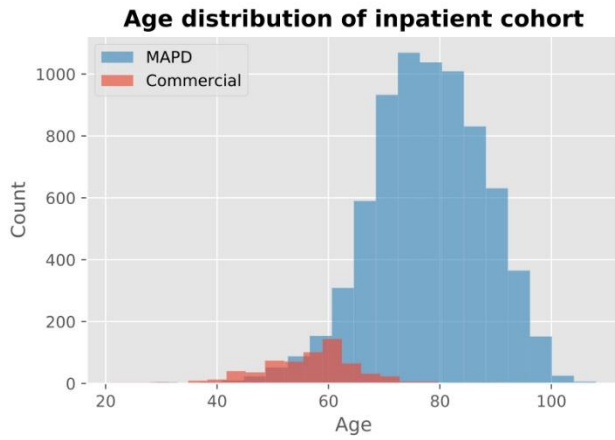

MAPD: Medicare Advantage with Part D coverage

**Figure S5. Propensity score distributions for treatment comparisons in the primary outpatient cohort.**

**(A) ACE inhibitor vs others**

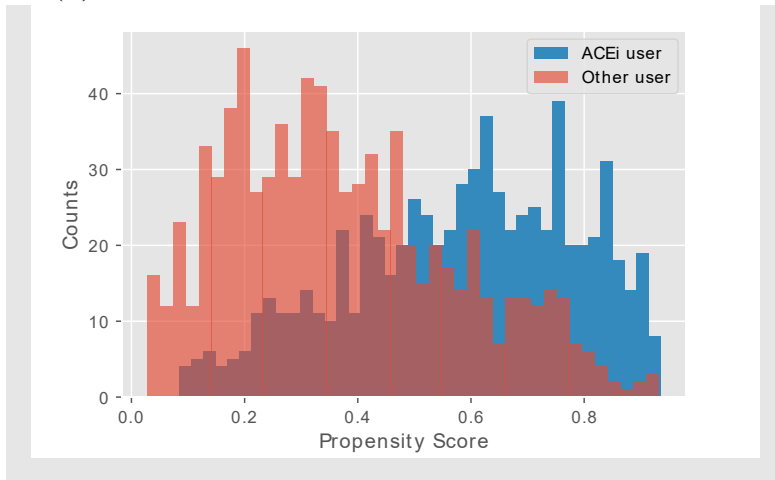

**(B) ARB vs others**

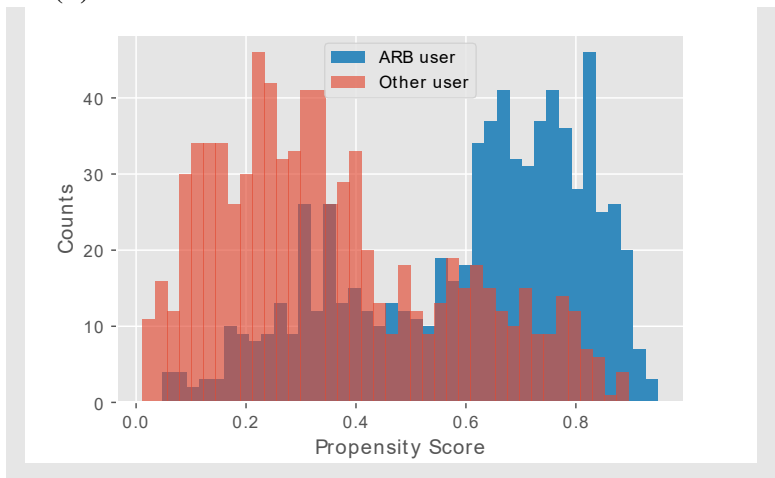

**(C) ACE inhibitor vs ARB**

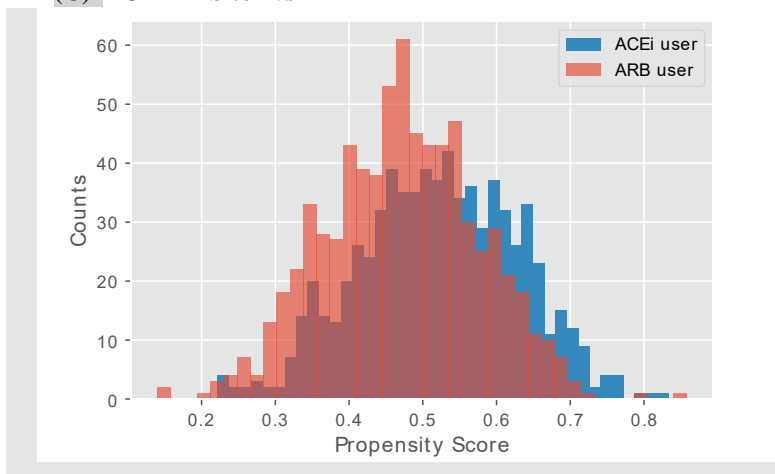

**Figure S6. Standardized Differences Between Variables Before and After Propensity Matching.**

**(A) ACE Inhibitor vs Other Anti-hypertensive Agent: Outpatient Cohort**

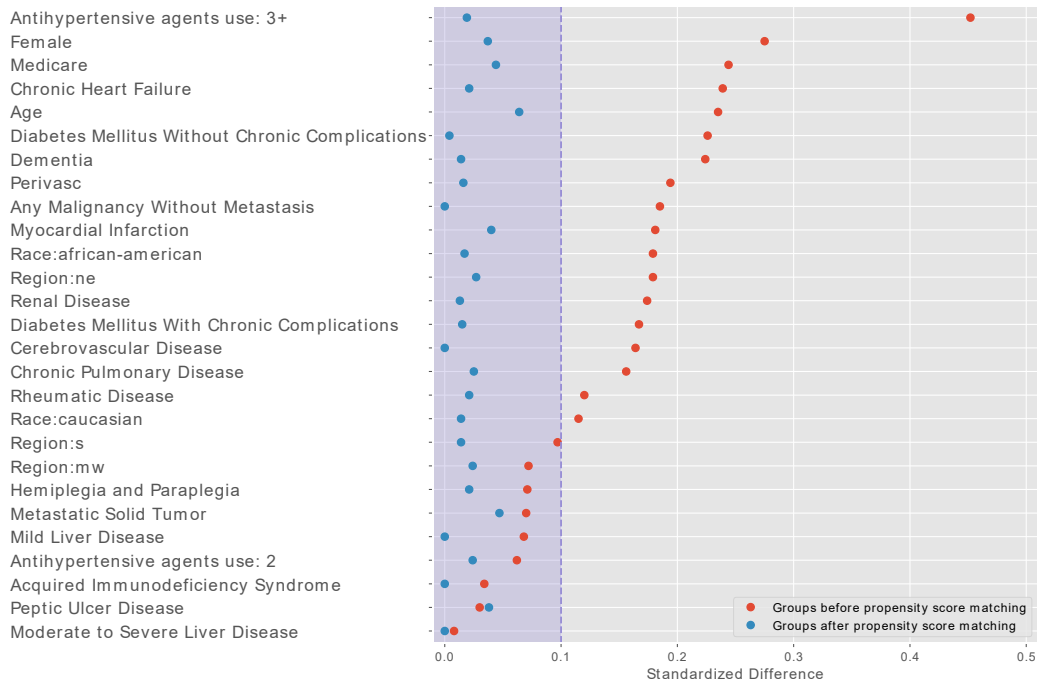

**(B) ACE Inhibitor vs Other Anti-hypertensive Agent: Inpatient Cohort**

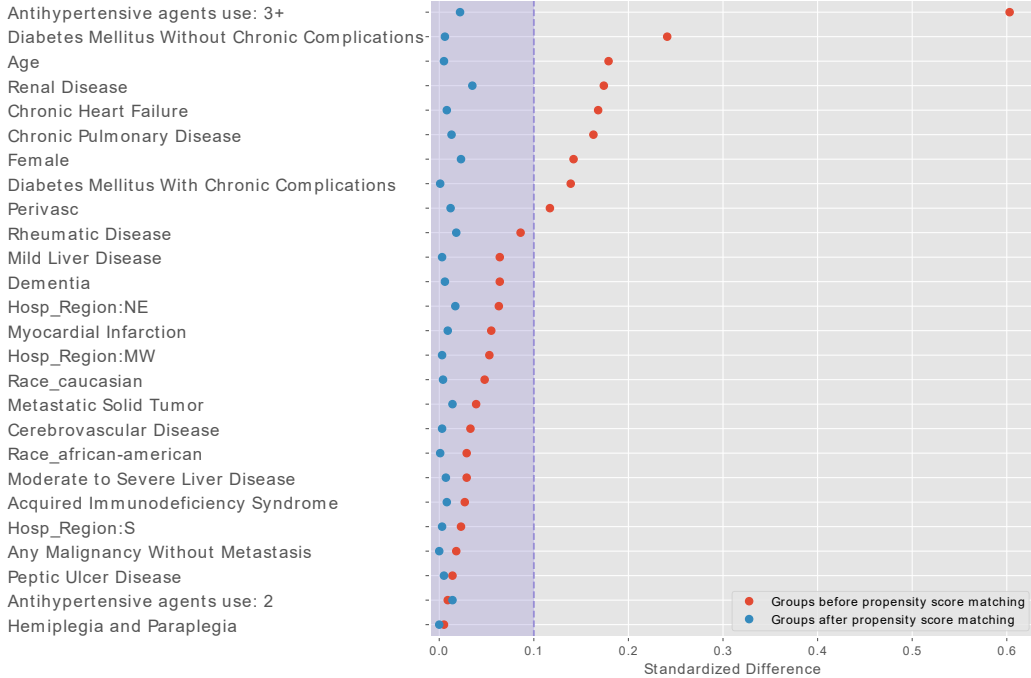

**Figure S7. Propensity score distributions for treatment comparisons in the primary inpatient cohort.**

**(A) ACE inhibitor vs others**

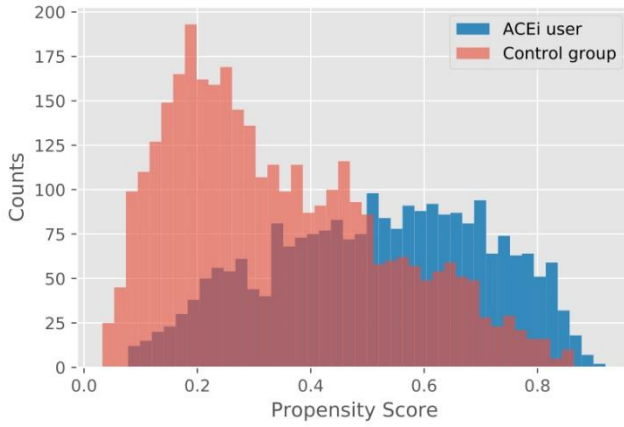

**(B) ARB vs others**

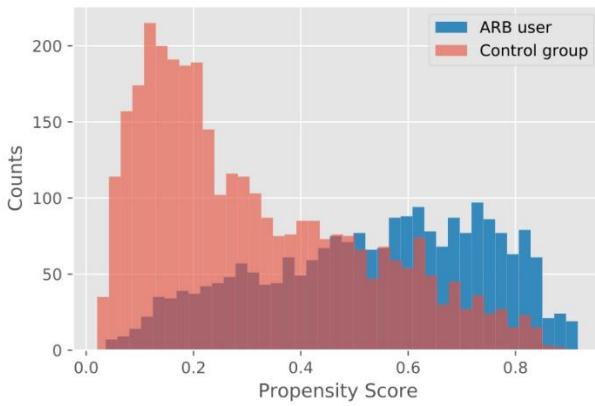

**(C) ACE inhibitor vs ARB**

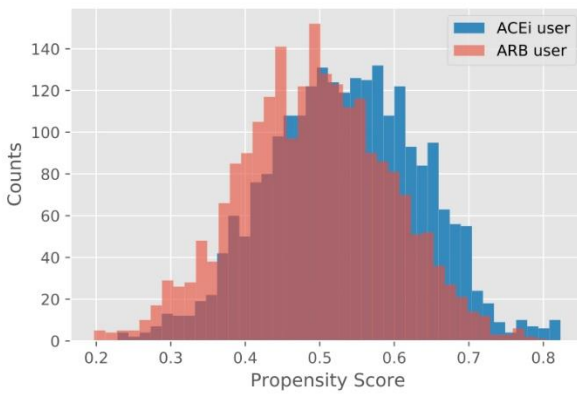



**Figure S8. Histogram on p-values and adjusted hazard ratios from 100 matches, primary outpatient cohort.**

**(A) ACE inhibitor versus others in full population, histogram of p-values**

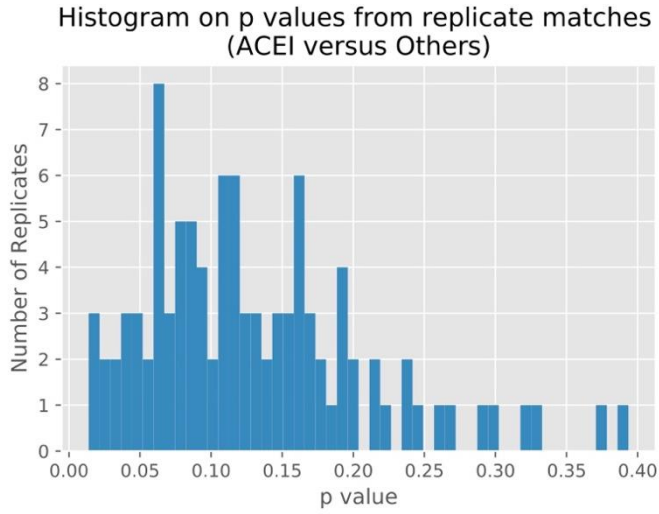

**(B) ACE inhibitor versus others in the full population, histogram of hazard ratios**

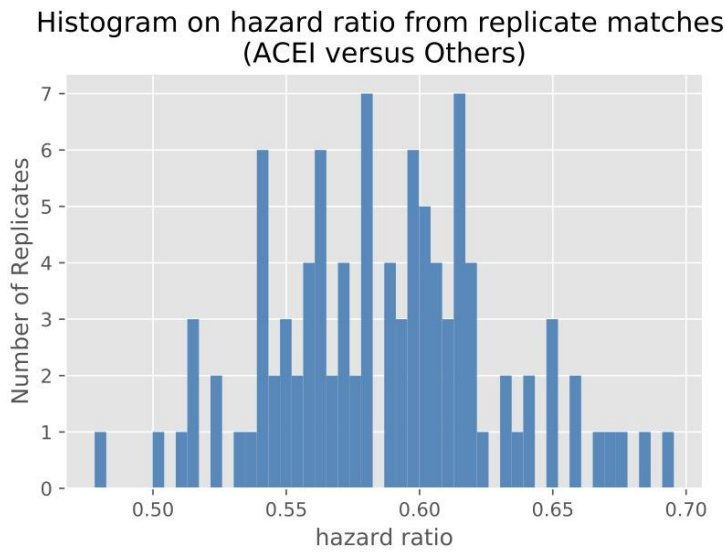

**(C) ACE inhibitor versus others in Medicare Advantage population, histogram of p-values**

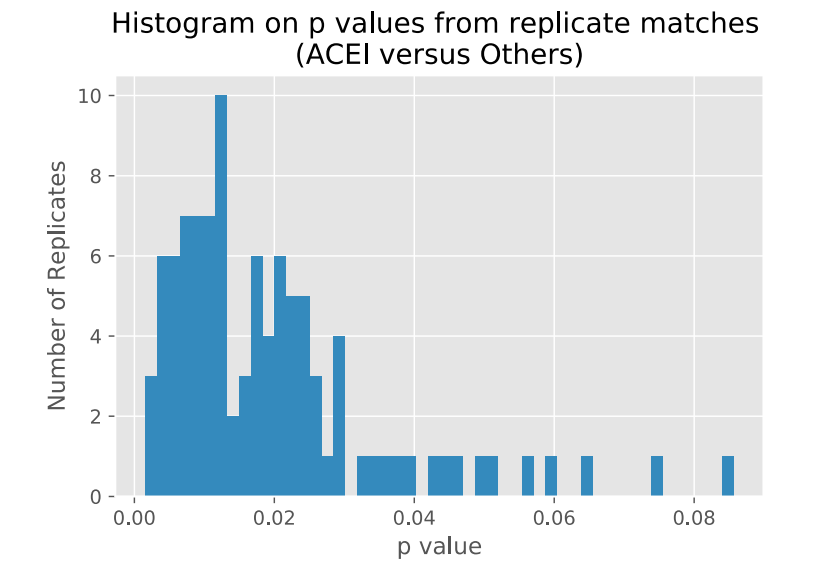

**(D) ACE inhibitor versus others in Medicare Advantage population, histogram of hazard ratios**

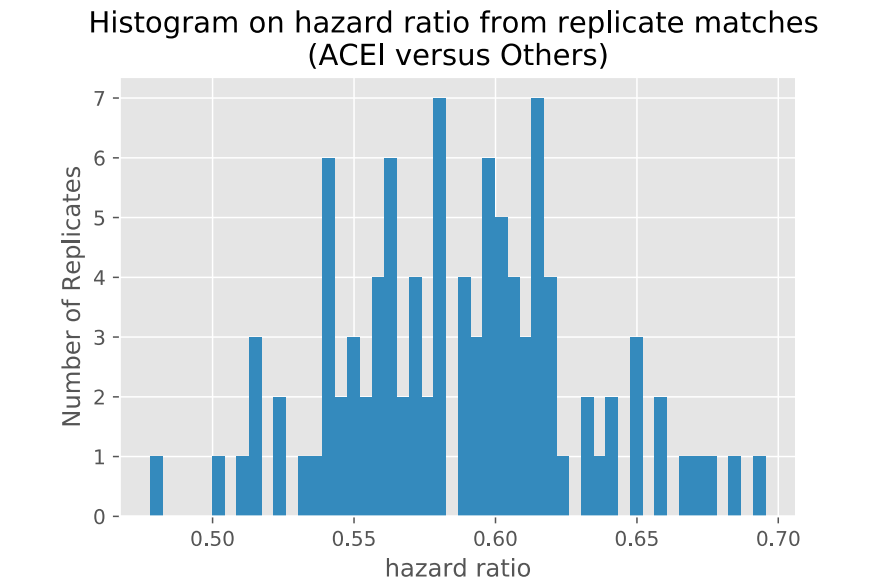

Supplement: JAH3-10-e018086-s001.pdf [file JAH3-10-e018086-s001.pdf]
